# Supplementary material for: Plant Extracts Control In Vitro Growth of Disease-Causing Fungi in Chayote
Source: MDPI journal article supplement (doi:10.3390/plants12091800), 2023-04-27
Supplement: s1 [file s1]

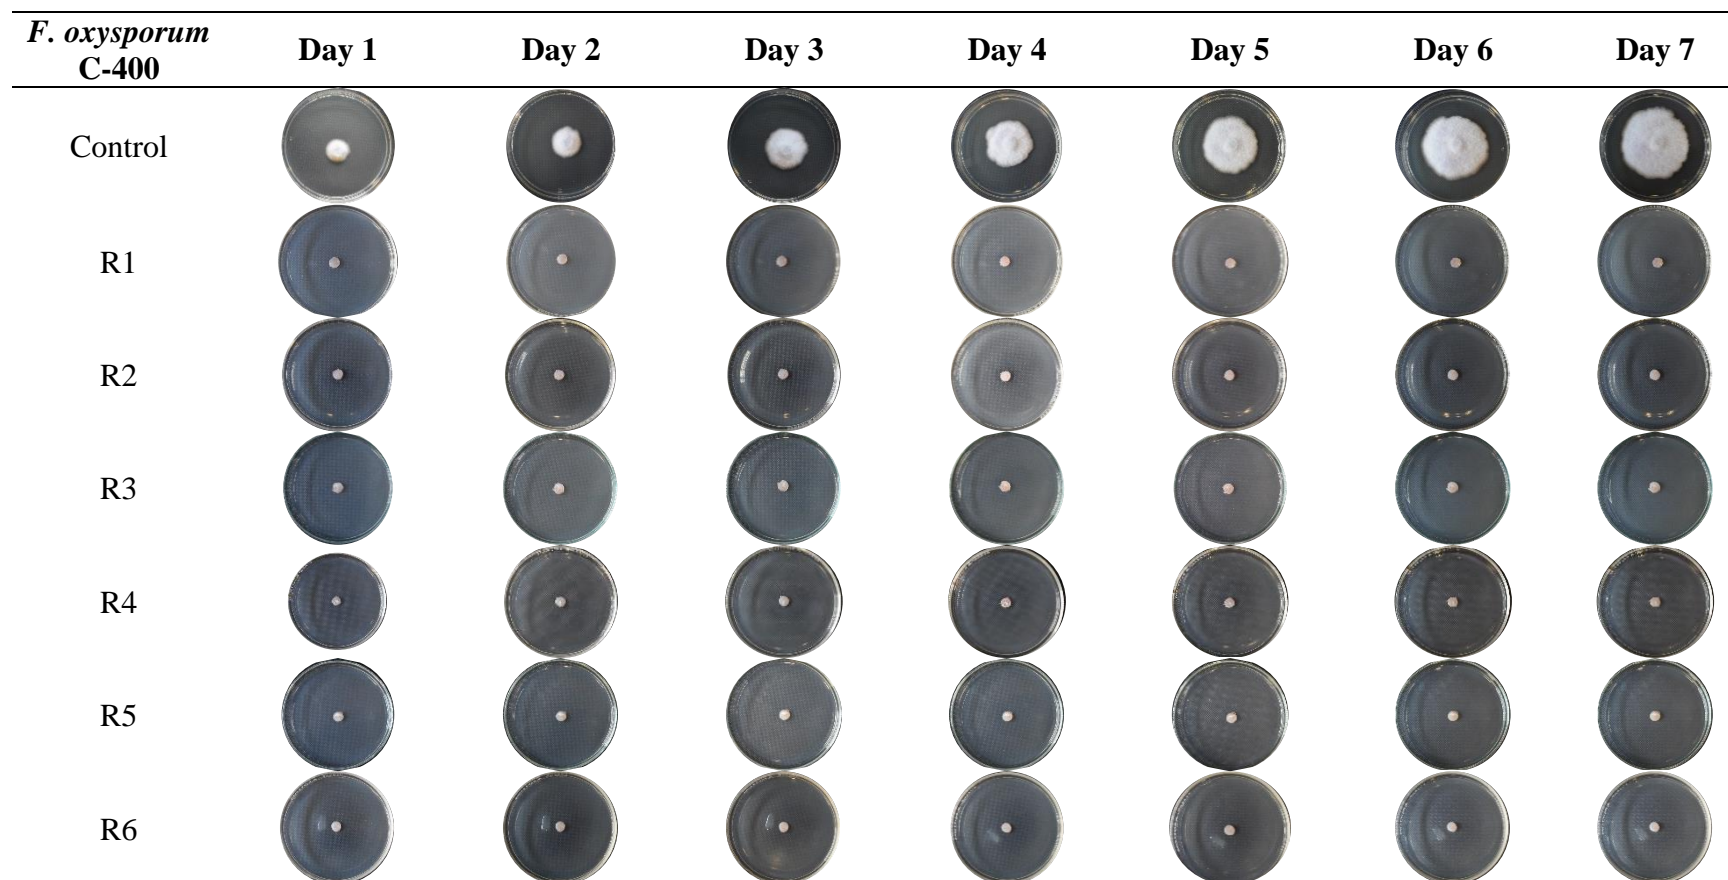

**Figure S1.** Effect on fungal growth of *Fusarium oxysporum* after treatment with 400 ppm of cinnamon oil. R1-R6: repetitions

| <i>F. oxysporum</i><br>C-350 | Day 1                                                                               | Day 2                                                                               | Day 3                                                                                | Day 4                                                                                 | Day 5                                                                                 | Day 6                                                                                 | Day 7                                                                                 |
|------------------------------|-------------------------------------------------------------------------------------|-------------------------------------------------------------------------------------|--------------------------------------------------------------------------------------|---------------------------------------------------------------------------------------|---------------------------------------------------------------------------------------|---------------------------------------------------------------------------------------|---------------------------------------------------------------------------------------|
| Control                      |    |    |    |    |    |    |    |
| R1                           |    |    |    |    |    |    |    |
| R2                           |    |    |    |    |    |    |    |
| R3                           |    |    |    |    |    |    |    |
| R4                           |    |    |    |    |    |    |    |
| R5                           |   |   |   |   |   |   |   |
| R6                           |  |  |  |  |  |  |  |

**Figure S2.** Effect on fungal growth of *Fusarium oxysporum* after treatment with 350 ppm of cinnamon oil. R1-R6: repetitions

| <i>F. oxysporum</i><br>C-300 | Day 1                                                                               | Day 2                                                                               | Day 3                                                                                | Day 4                                                                                 | Day 5                                                                                 | Day 6                                                                                 | Day 7                                                                                 |
|------------------------------|-------------------------------------------------------------------------------------|-------------------------------------------------------------------------------------|--------------------------------------------------------------------------------------|---------------------------------------------------------------------------------------|---------------------------------------------------------------------------------------|---------------------------------------------------------------------------------------|---------------------------------------------------------------------------------------|
| Control                      |    |    |    |    |    |    |    |
| R1                           |    |    |    |    |    |    |    |
| R2                           |    |    |    |    |    |    |    |
| R3                           |    |    |    |    |    |    |    |
| R4                           |   |   |   |   |   |   |   |
| R5                           |  |  |  |  |  |  |  |
| R6                           |  |  |  |  |  |  |  |

**Figure S3.** Effect on fungal growth of *Fusarium oxysporum* after treatment with 300 ppm of cinnamon oil. R1-R6: repetitions

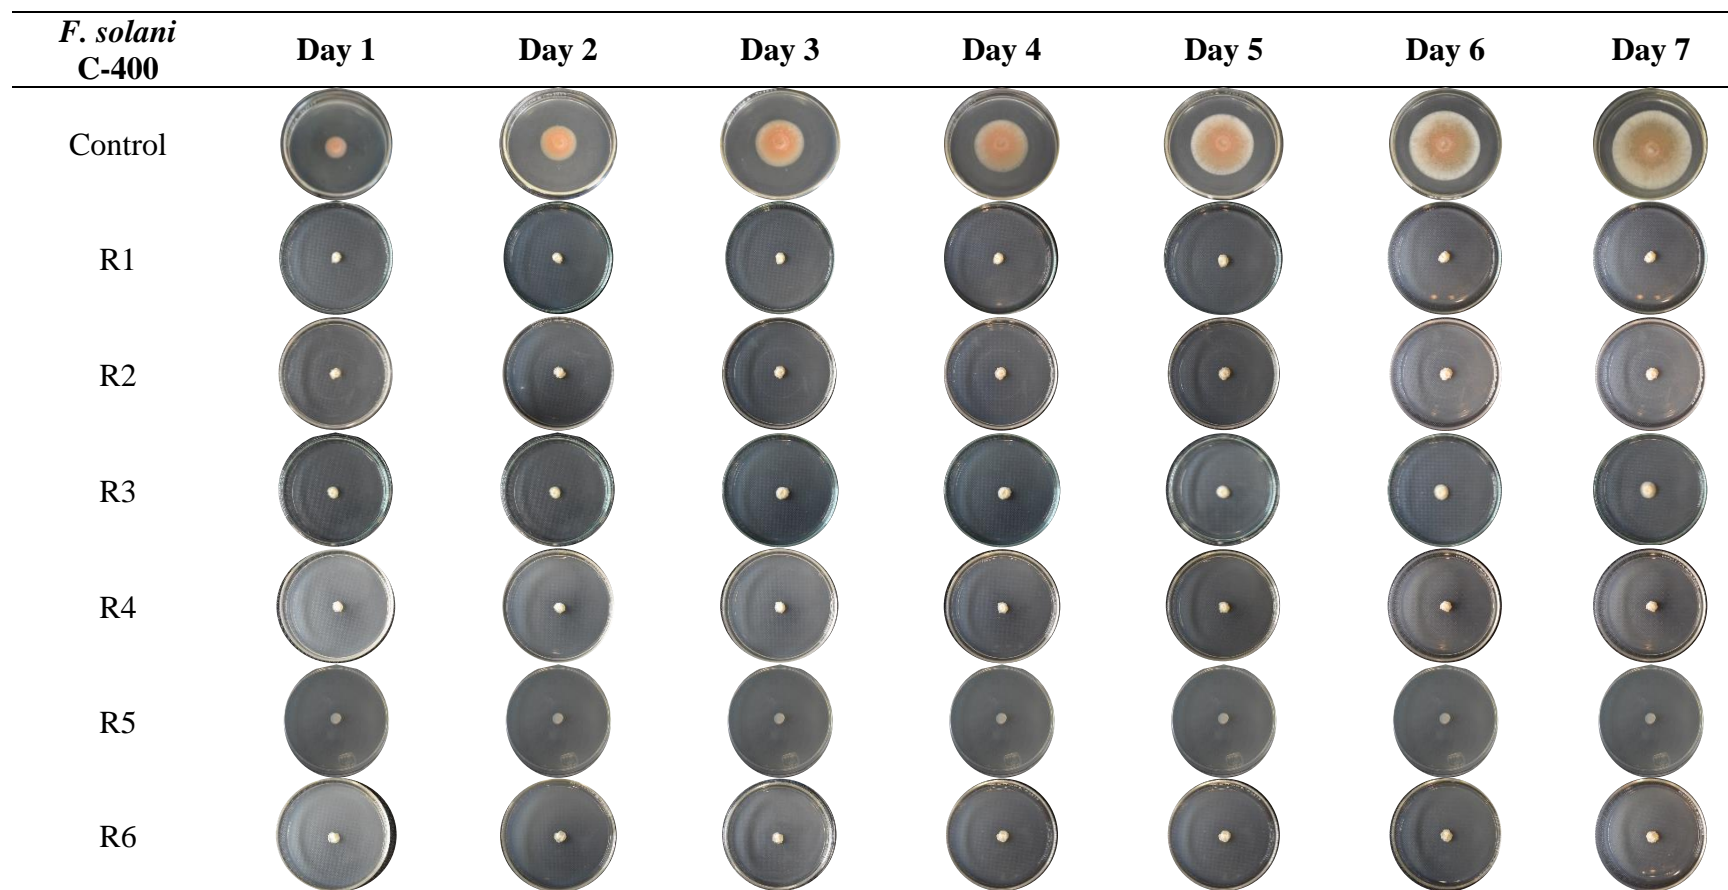

**Figure S4.** Effect on fungal growth of *Fusarium solani* after treatment with 400 ppm of cinnamon oil. R1-R6: repetitions

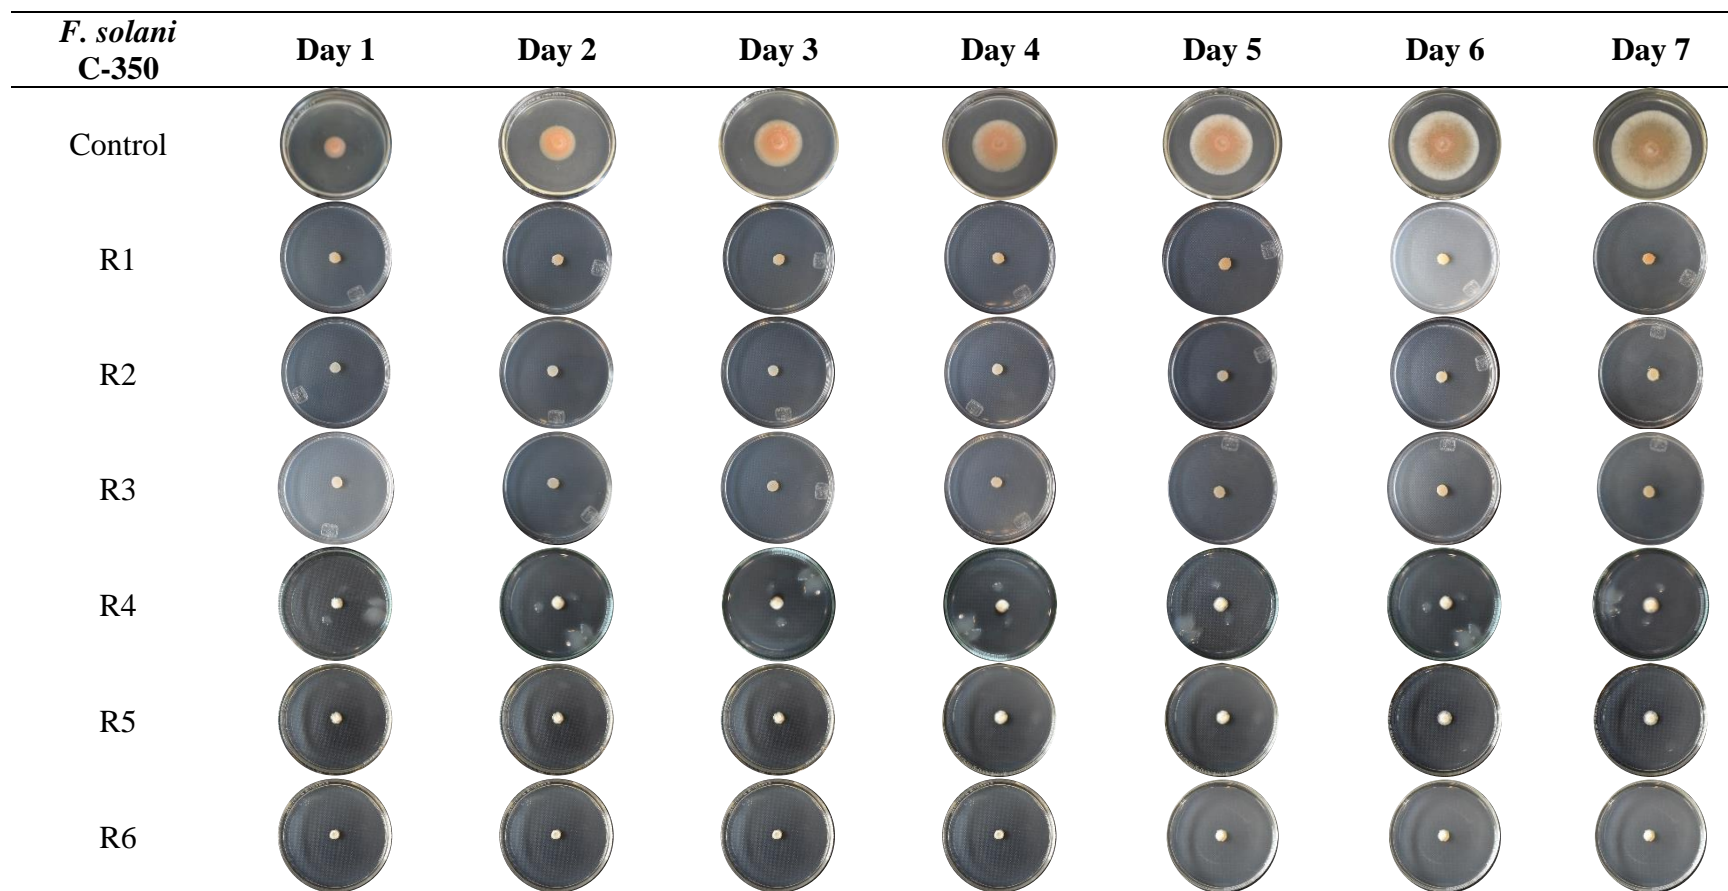

**Figure S5.** Effect on fungal growth of *Fusarium solani* after treatment with 350 ppm of cinnamon oil. R1-R6: repetitions



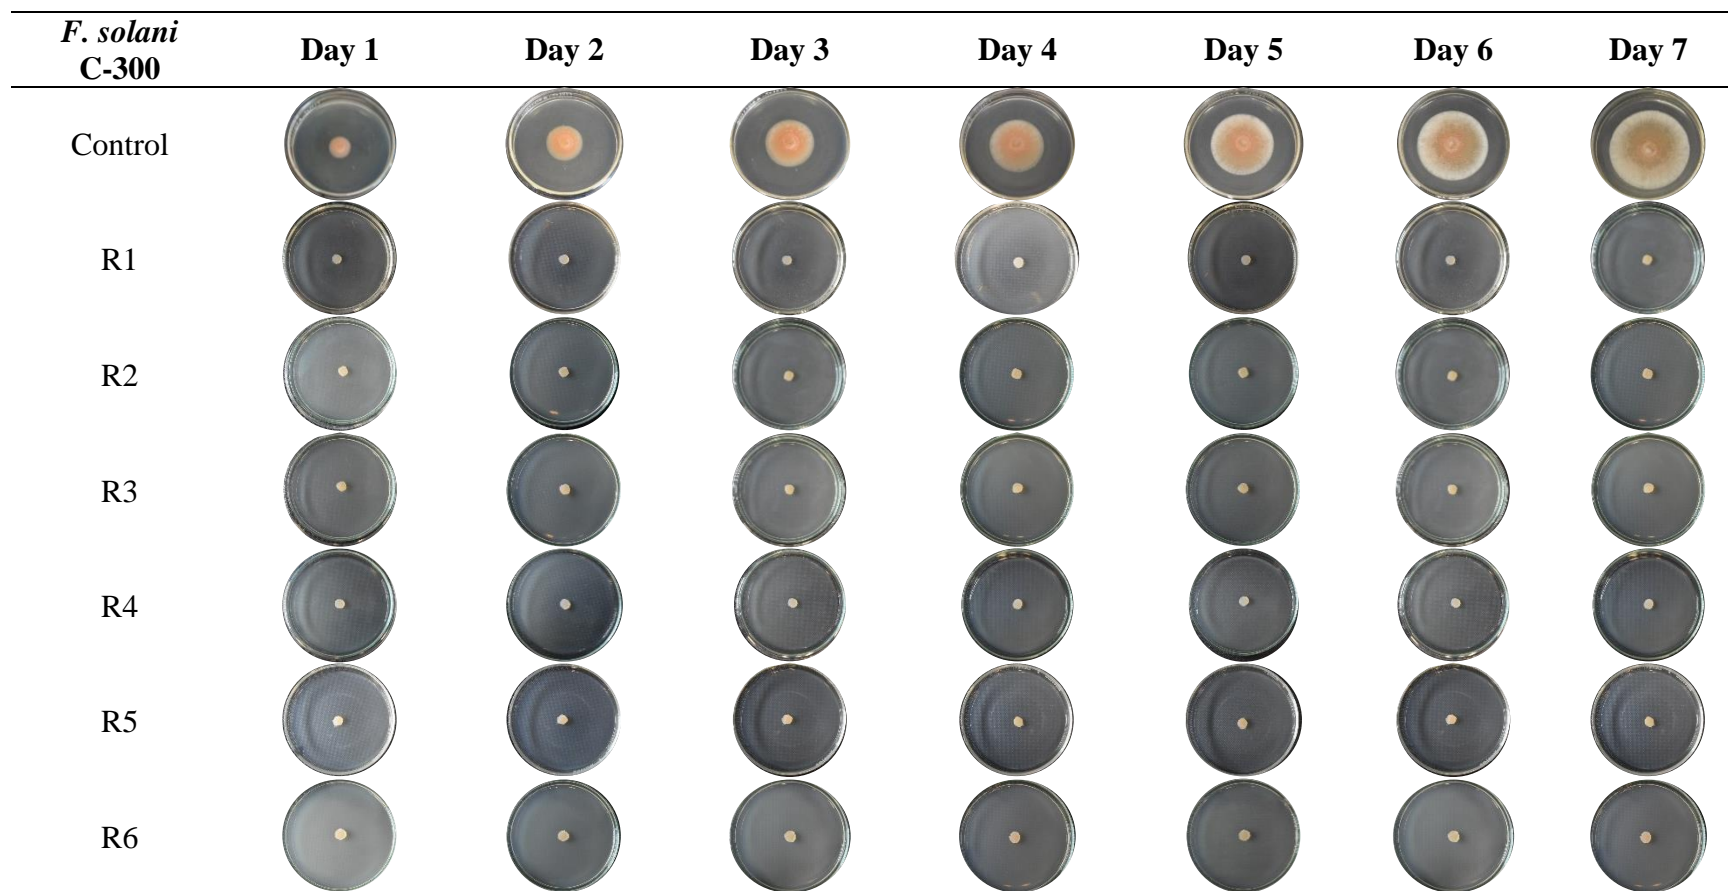

**Figure S6.** Effect on fungal growth of *Fusarium solani* after treatment with 300 ppm of cinnamon oil. R1-R6: repetitions

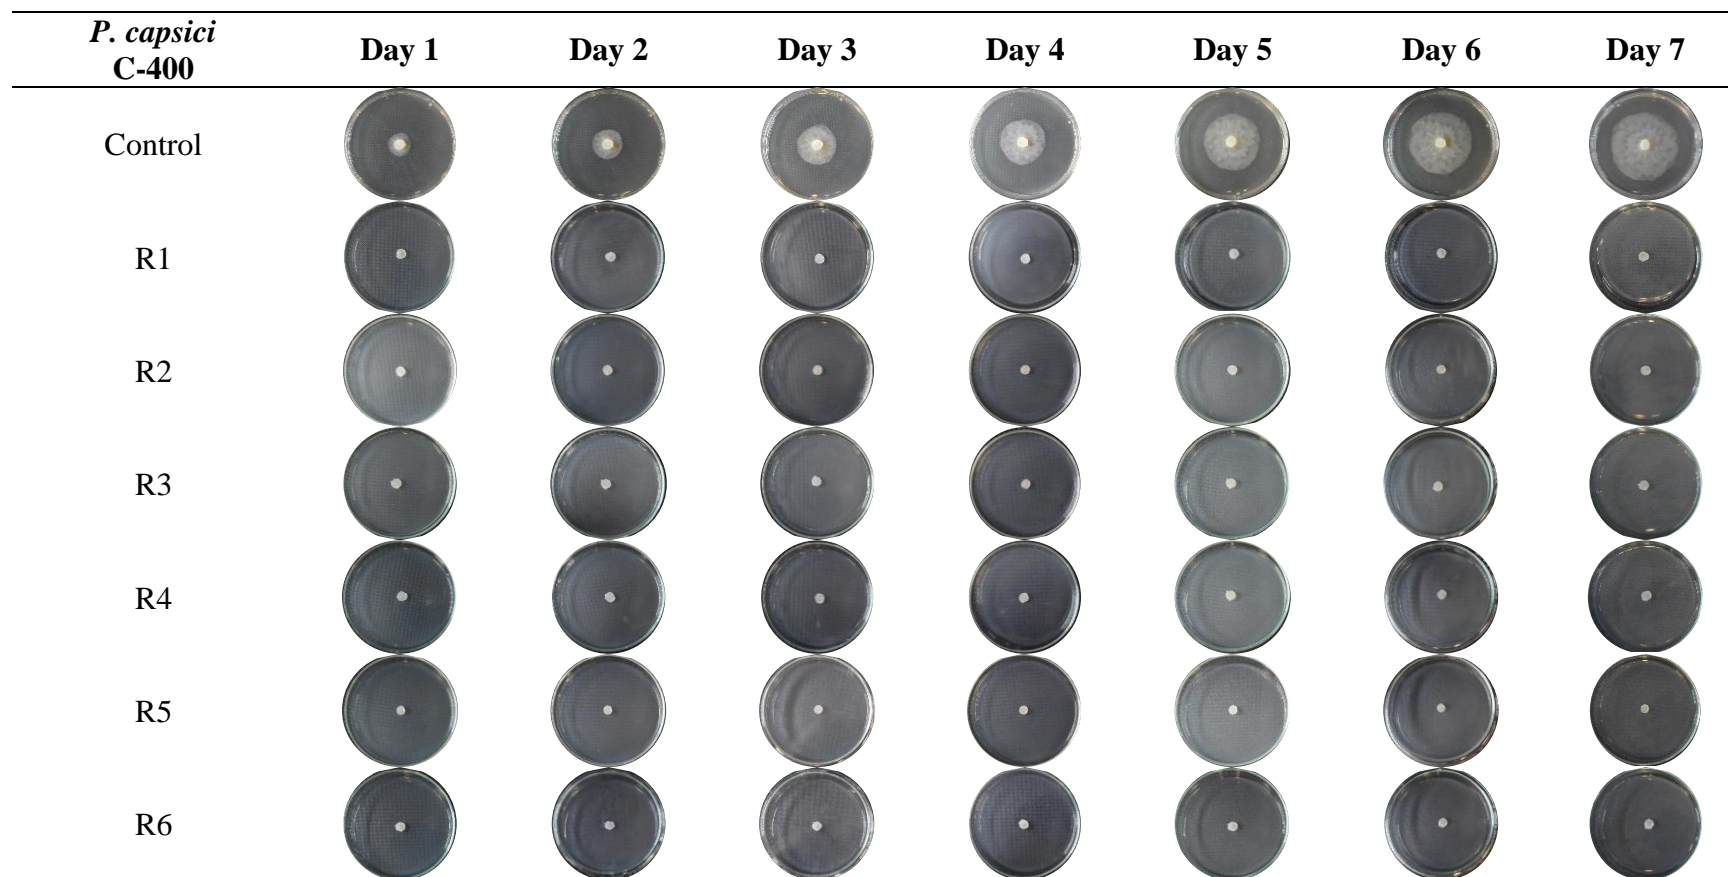

**Figure S7.** Effect on fungal growth of *Phytophthora capsici* after treatment with 400 ppm of cinnamon oil. R1-R6: repetitions

| <i>P. capsici</i><br>C-350 | Day 1                                                                               | Day 2                                                                               | Day 3                                                                                | Day 4                                                                                 | Day 5                                                                                 | Day 6                                                                                 | Day 7                                                                                 |
|----------------------------|-------------------------------------------------------------------------------------|-------------------------------------------------------------------------------------|--------------------------------------------------------------------------------------|---------------------------------------------------------------------------------------|---------------------------------------------------------------------------------------|---------------------------------------------------------------------------------------|---------------------------------------------------------------------------------------|
| Control                    |    |    |    |    |    |    |    |
| R1                         |    |    |    |    |    |    |    |
| R2                         |    |    |    |    |    |    |    |
| R3                         |    |    |    |    |    |    |    |
| R4                         |    |    |    |    |    |    |    |
| R5                         |   |   |   |   |   |   |   |
| R6                         |  |  |  |  |  |  |  |

**Figure S8.** Effect on fungal growth of *Phytophthora capsici* after treatment with 350 ppm of cinnamon oil. R1-R6: repetitions



| <i>P. capsici</i><br>C-300 | Day 1                                                                               | Day 2                                                                               | Day 3                                                                                | Day 4                                                                                 | Day 5                                                                                 | Day 6                                                                                 | Day 7                                                                                 |
|----------------------------|-------------------------------------------------------------------------------------|-------------------------------------------------------------------------------------|--------------------------------------------------------------------------------------|---------------------------------------------------------------------------------------|---------------------------------------------------------------------------------------|---------------------------------------------------------------------------------------|---------------------------------------------------------------------------------------|
| Control                    |    |    |    |    |    |    |    |
| R1                         |    |    |    |    |    |    |    |
| R2                         |    |    |    |    |    |    |    |
| R3                         |    |    |    |    |    |    |    |
| R4                         |    |    |    |    |    |    |    |
| R5                         |   |   |   |   |   |   |   |
| R6                         |  |  |  |  |  |  |  |

**Figure S9.** Effect on fungal growth of *Phytophthora capsici* after treatment with 300 ppm of cinnamon oil. R1-R6: repetitions

| <i>Geotrichum</i> sp.<br>C-400 | Day 1                                                                               | Day 2                                                                               | Day 3                                                                                | Day 4                                                                                 | Day 5                                                                                 | Day 6                                                                                 | Day 7                                                                                 |
|--------------------------------|-------------------------------------------------------------------------------------|-------------------------------------------------------------------------------------|--------------------------------------------------------------------------------------|---------------------------------------------------------------------------------------|---------------------------------------------------------------------------------------|---------------------------------------------------------------------------------------|---------------------------------------------------------------------------------------|
| Control                        |    |    |    |    |    |    |    |
| R1                             |    |    |    |    |    |    |    |
| R2                             |    |    |    |    |    |    |    |
| R3                             |    |    |    |    |    |    |    |
| R4                             |    |    |    |    |    |    |    |
| R5                             |   |   |   |   |   |   |   |
| R6                             |  |  |  |  |  |  |  |

**Figure S10.** Effect on fungal growth of *Geotrichum* sp. after treatment with 400 ppm of cinnamon oil. R1-R6: repetitions

| <i>Geotrichum</i> sp.<br>C-350 | Day 1                                                                              | Day 2                                                                              | Day 3                                                                               | Day 4                                                                                | Day 5                                                                                | Day 6                                                                                | Day 7                                                                                |
|--------------------------------|------------------------------------------------------------------------------------|------------------------------------------------------------------------------------|-------------------------------------------------------------------------------------|--------------------------------------------------------------------------------------|--------------------------------------------------------------------------------------|--------------------------------------------------------------------------------------|--------------------------------------------------------------------------------------|
| Control                        |   |   |   |   |   |   |   |
| R1                             |   |   |   |   |   |   |   |
| R2                             |   |   |   |   |   |   |   |
| R3                             |   |   |   |   |   |   |   |
| R4                             |   |   |   |   |   |   |   |
| R5                             |   |   |   |   |   |   |   |
| R6                             |  |  |  |  |  |  |  |

**Figure S11.** Effect on fungal growth of *Geotrichum* sp. after treatment with 350 ppm of cinnamon oil. R1-R6: repetitions

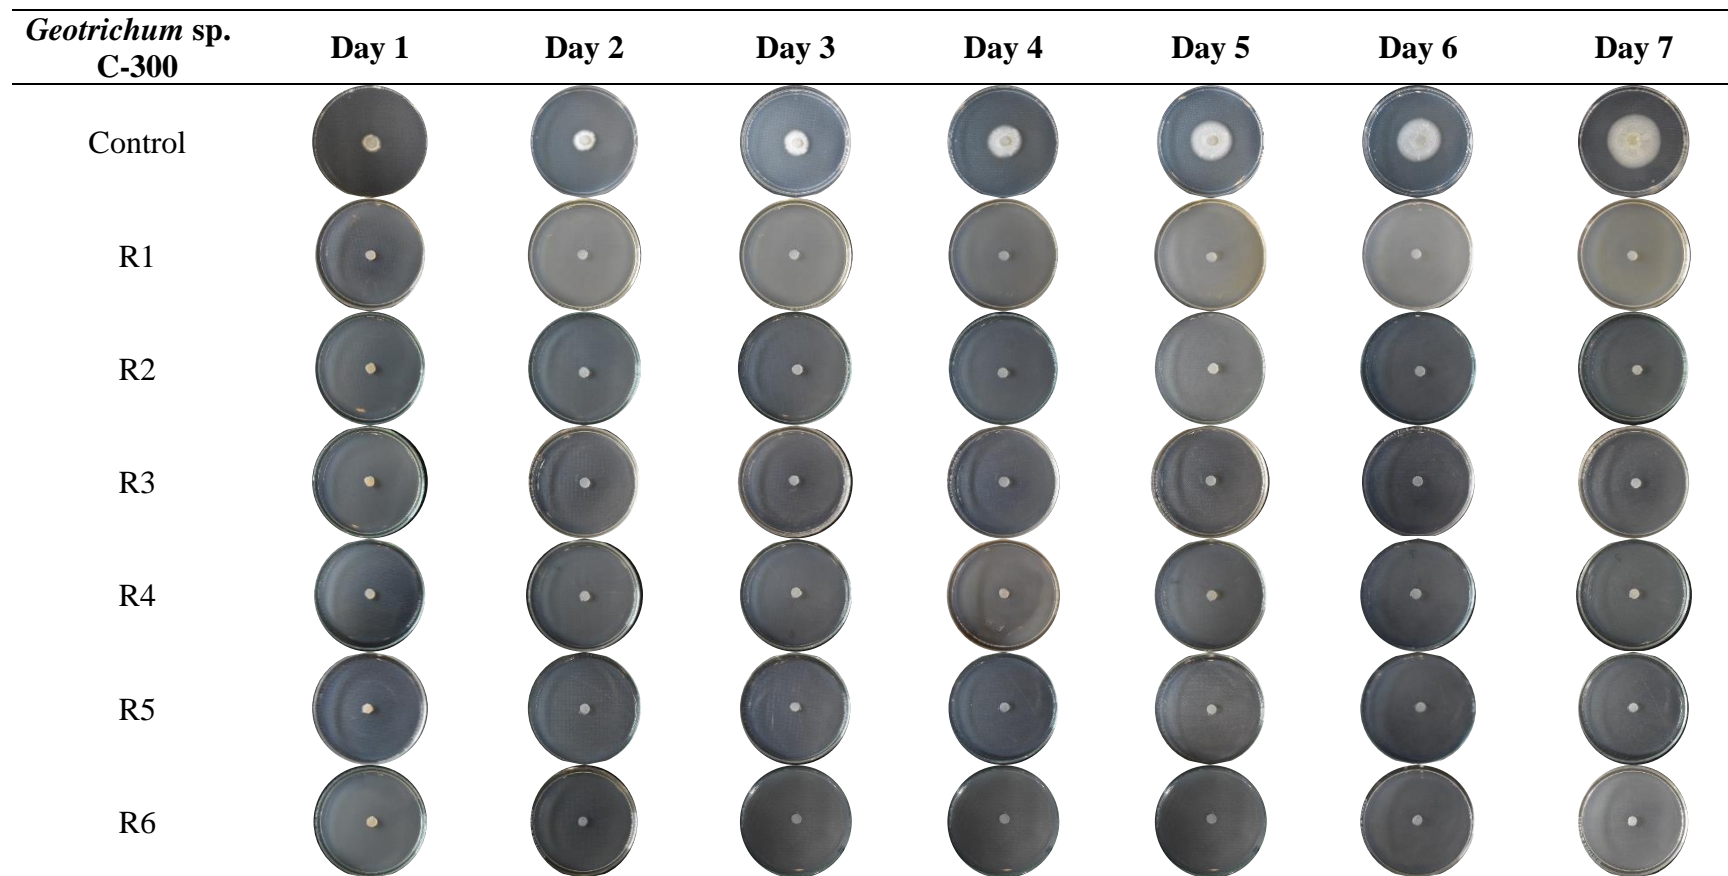

**Figure S12.** Effect on fungal growth of *Geotrichum* sp. after treatment with 300 ppm of cinnamon oil. R1-R6: repetitions

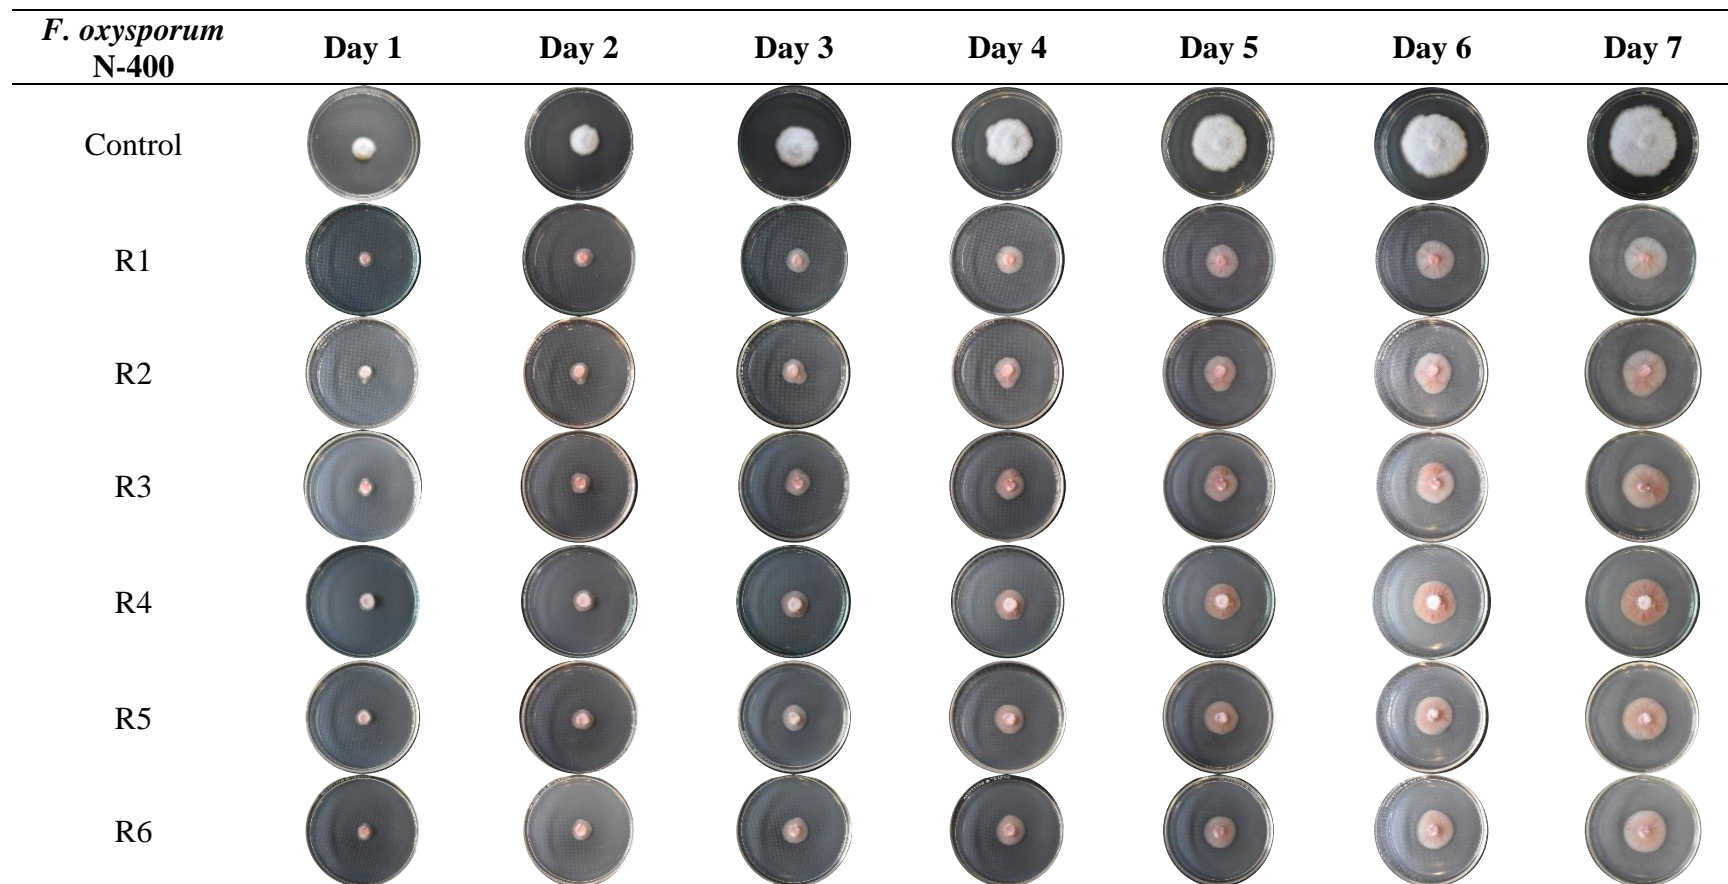

**Figure S13.** Effect on fungal growth of *Fusarium oxysporum* after treatment with 400 ppm of neem oil. R1-R6: repetitions



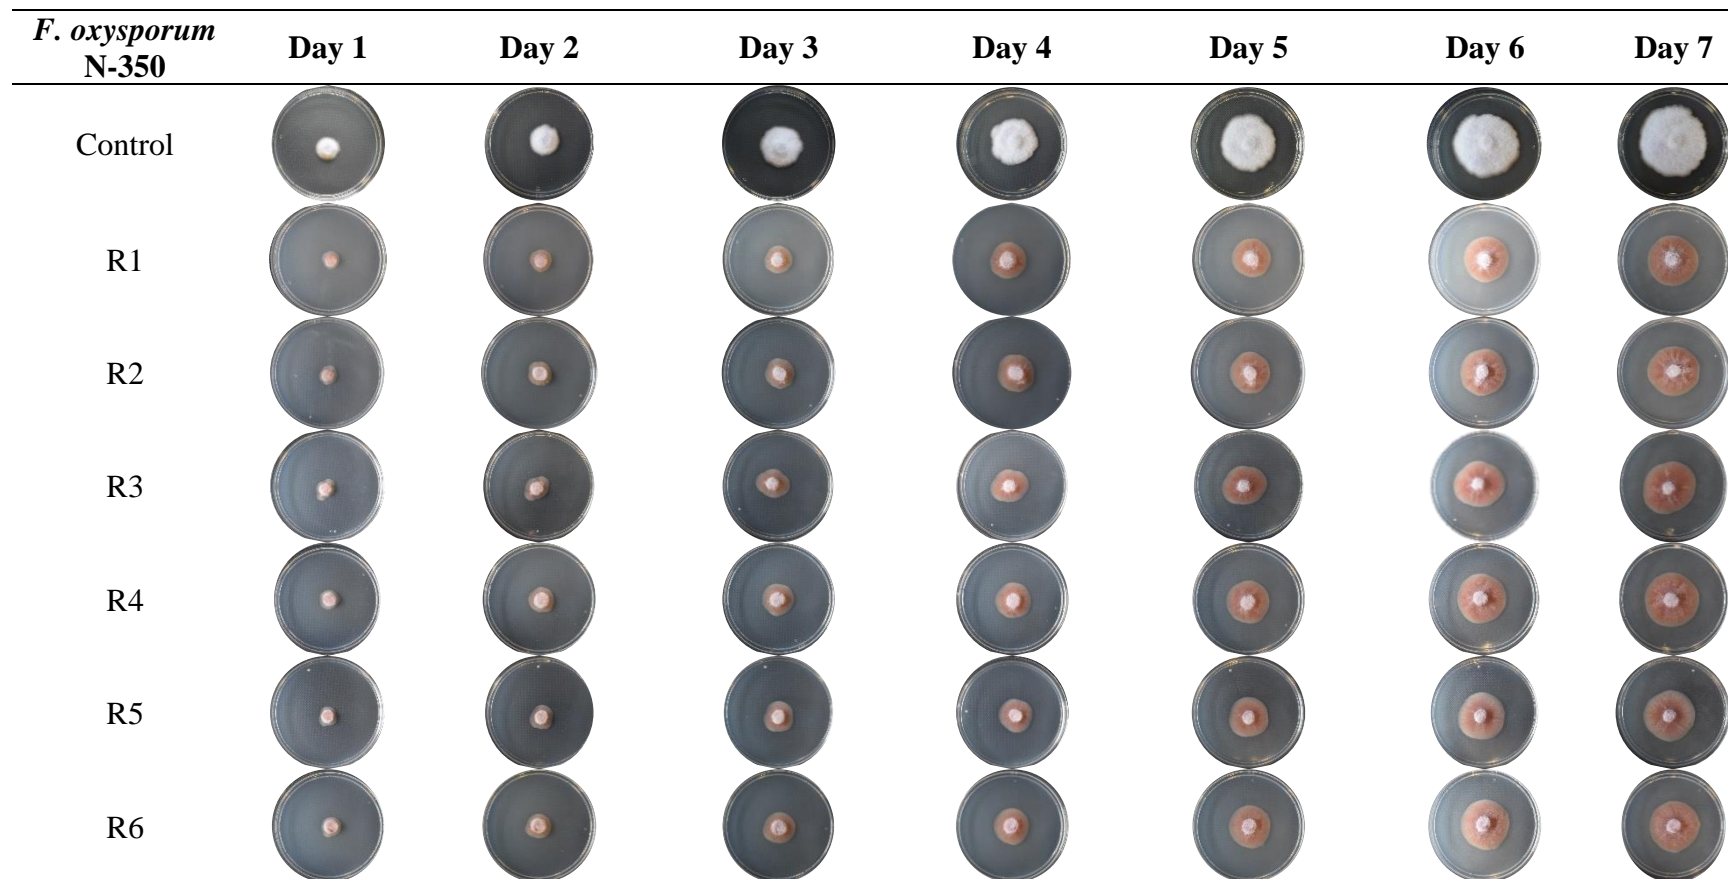

**Figure S14.** Effect on fungal growth of *Fusarium oxysporum* after treatment with 350 ppm of neem oil. R1-R6: repetitions

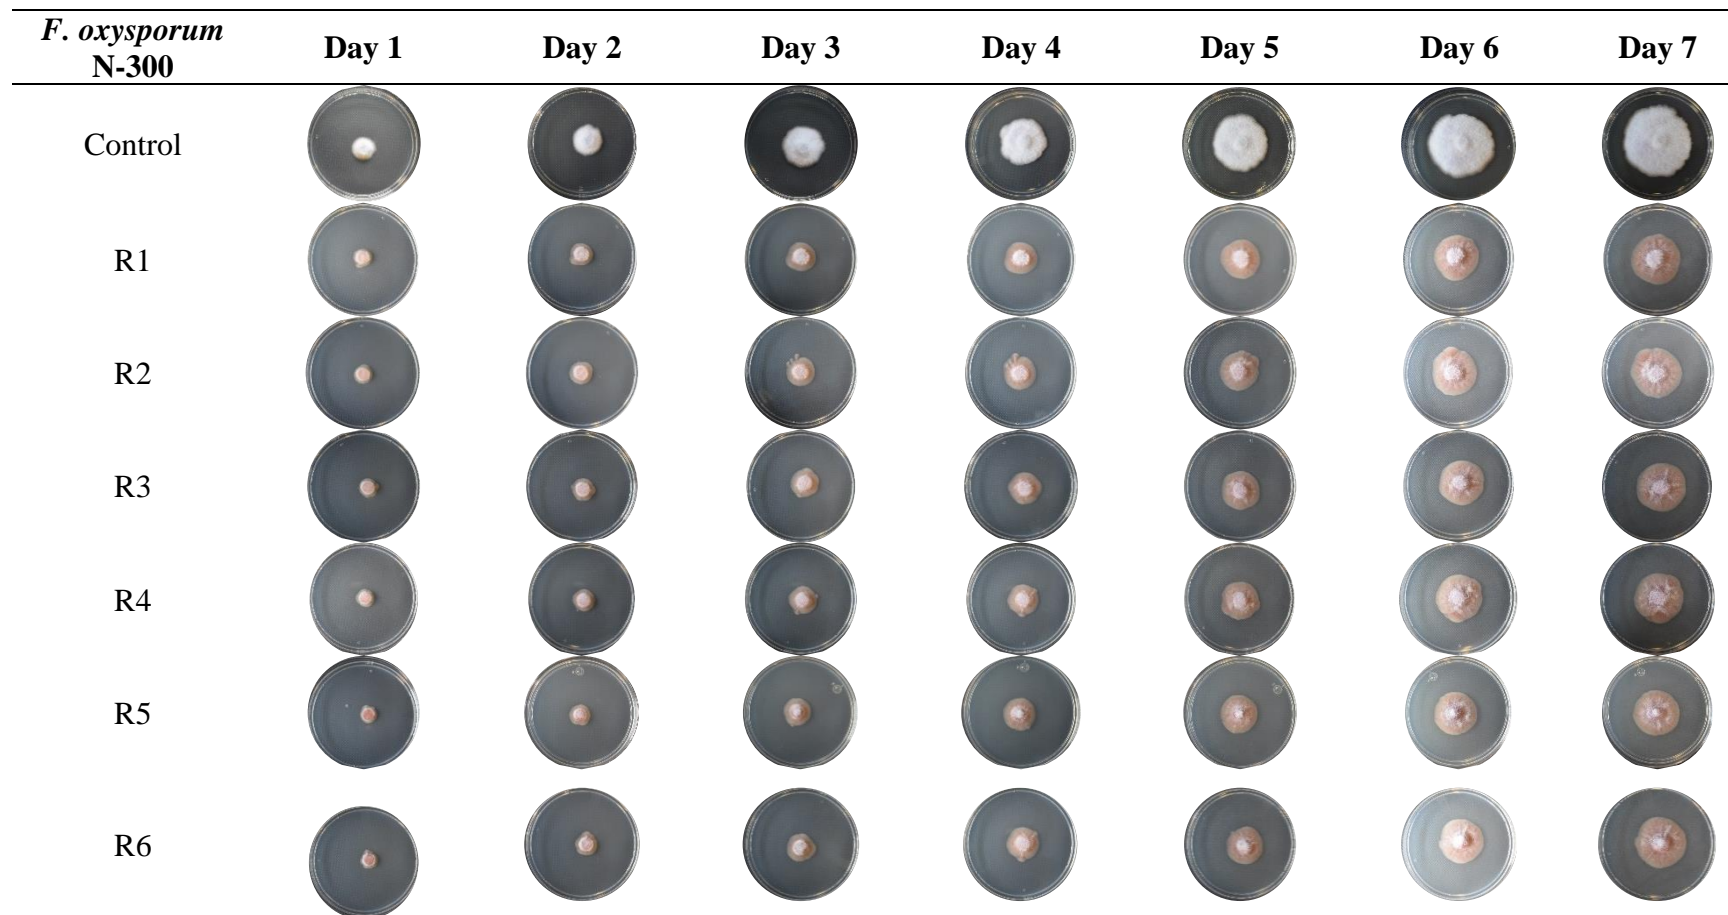

**Figure S15.** Effect on fungal growth of *Fusarium oxysporum* after treatment with 300 ppm of neem oil. R1-R6: repetitions

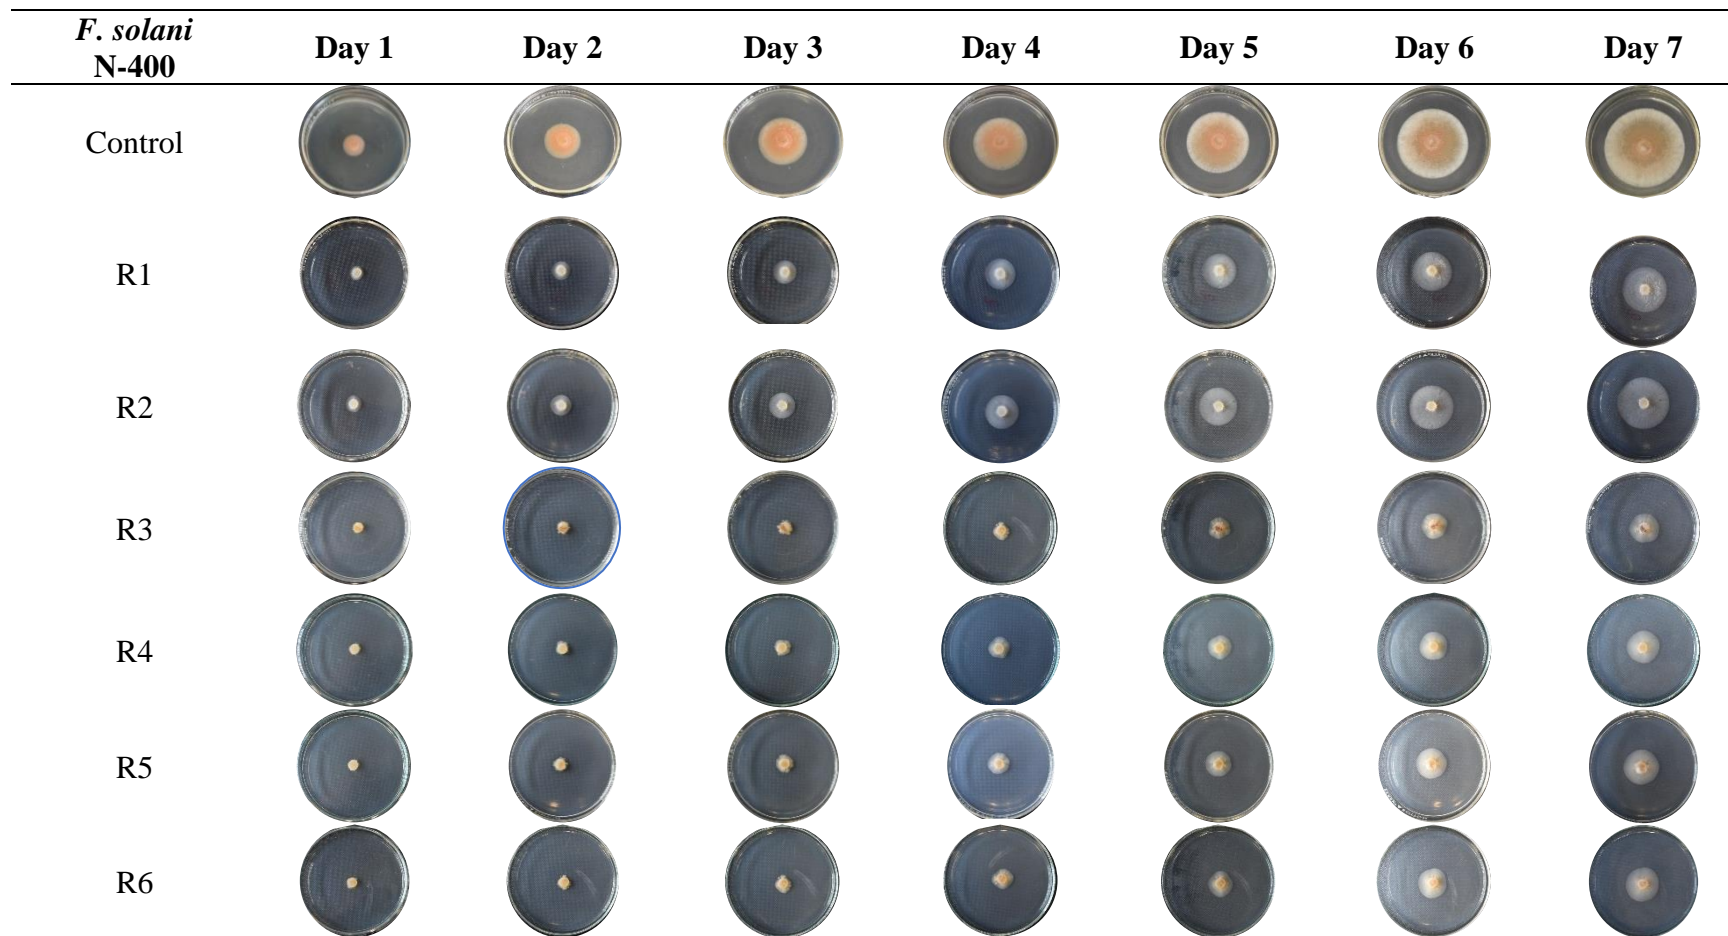

**Figure S16.** Effect on fungal growth of *Fusarium solani* after treatment with 400 ppm of neem oil. R1-R6: repetitions

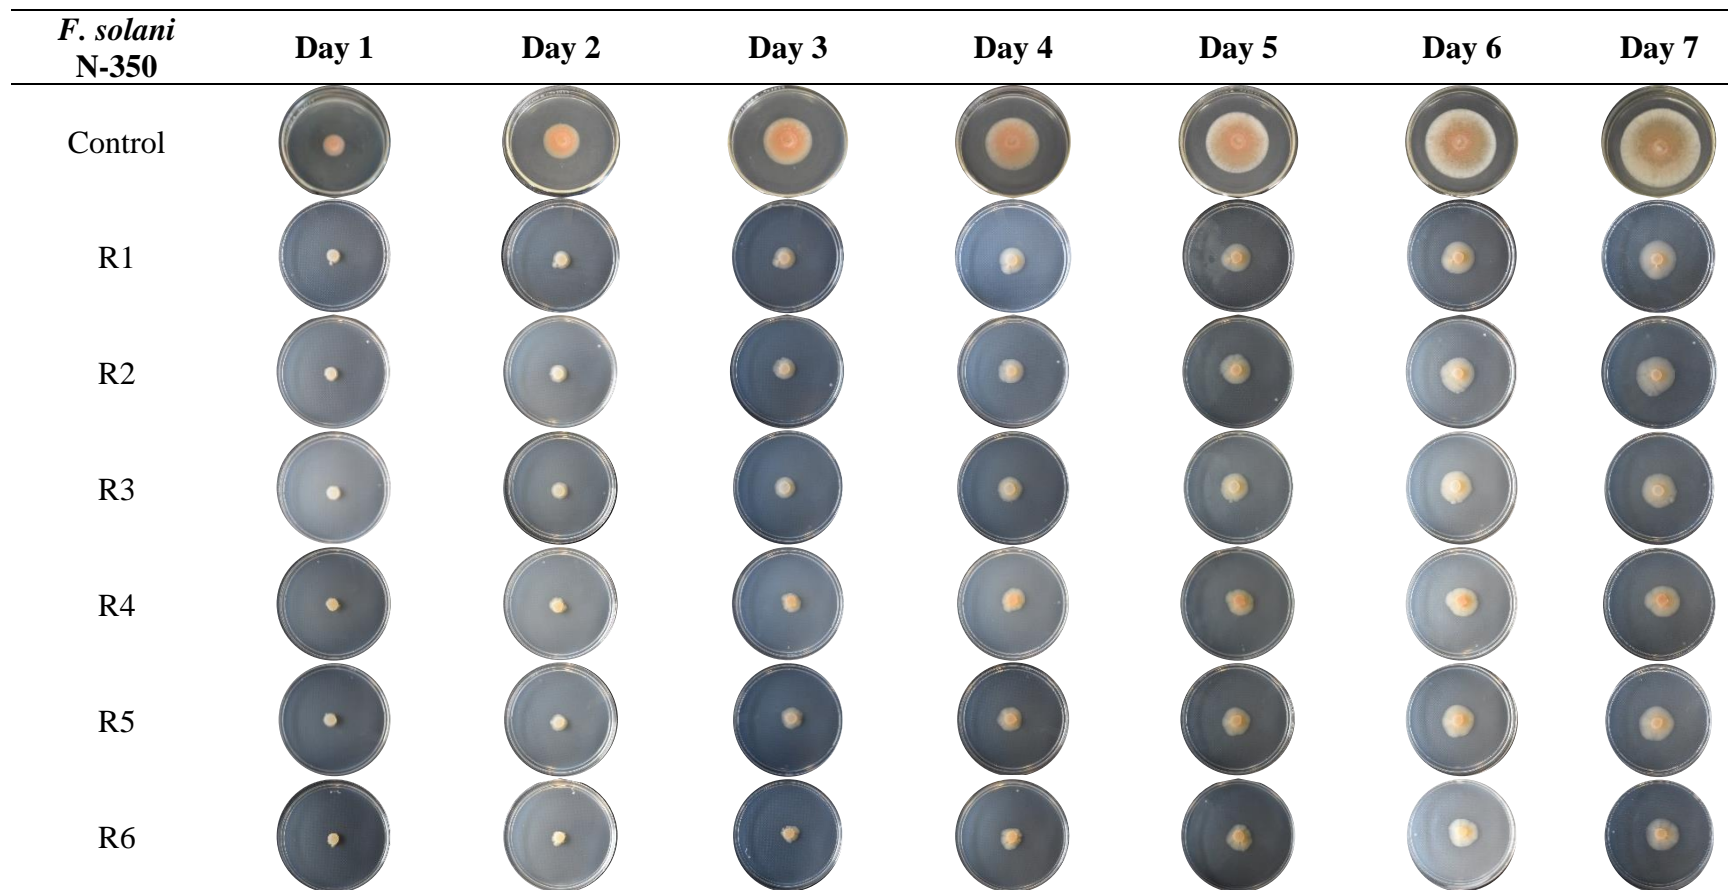

**Figure S17.** Effect on fungal growth of *Fusarium solani* after treatment with 350 ppm of neem oil. R1-R6: repetitions



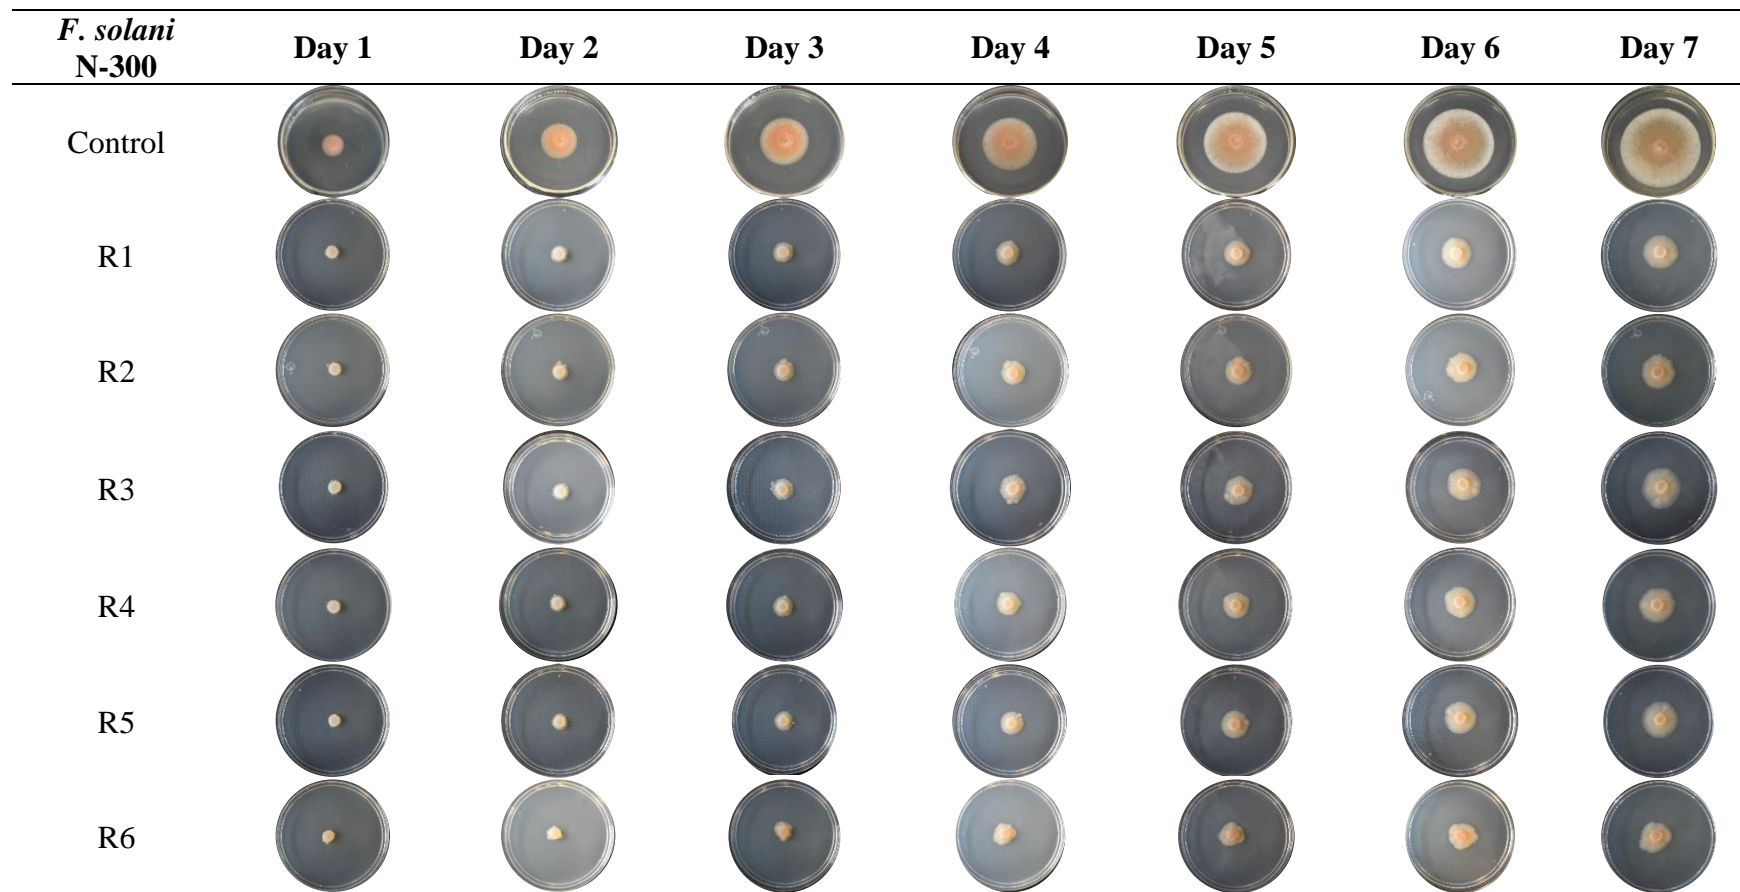

**Figure S18.** Effect on fungal growth of *Fusarium solani* after treatment with 300 ppm of neem oil. R1-R6: repetitions



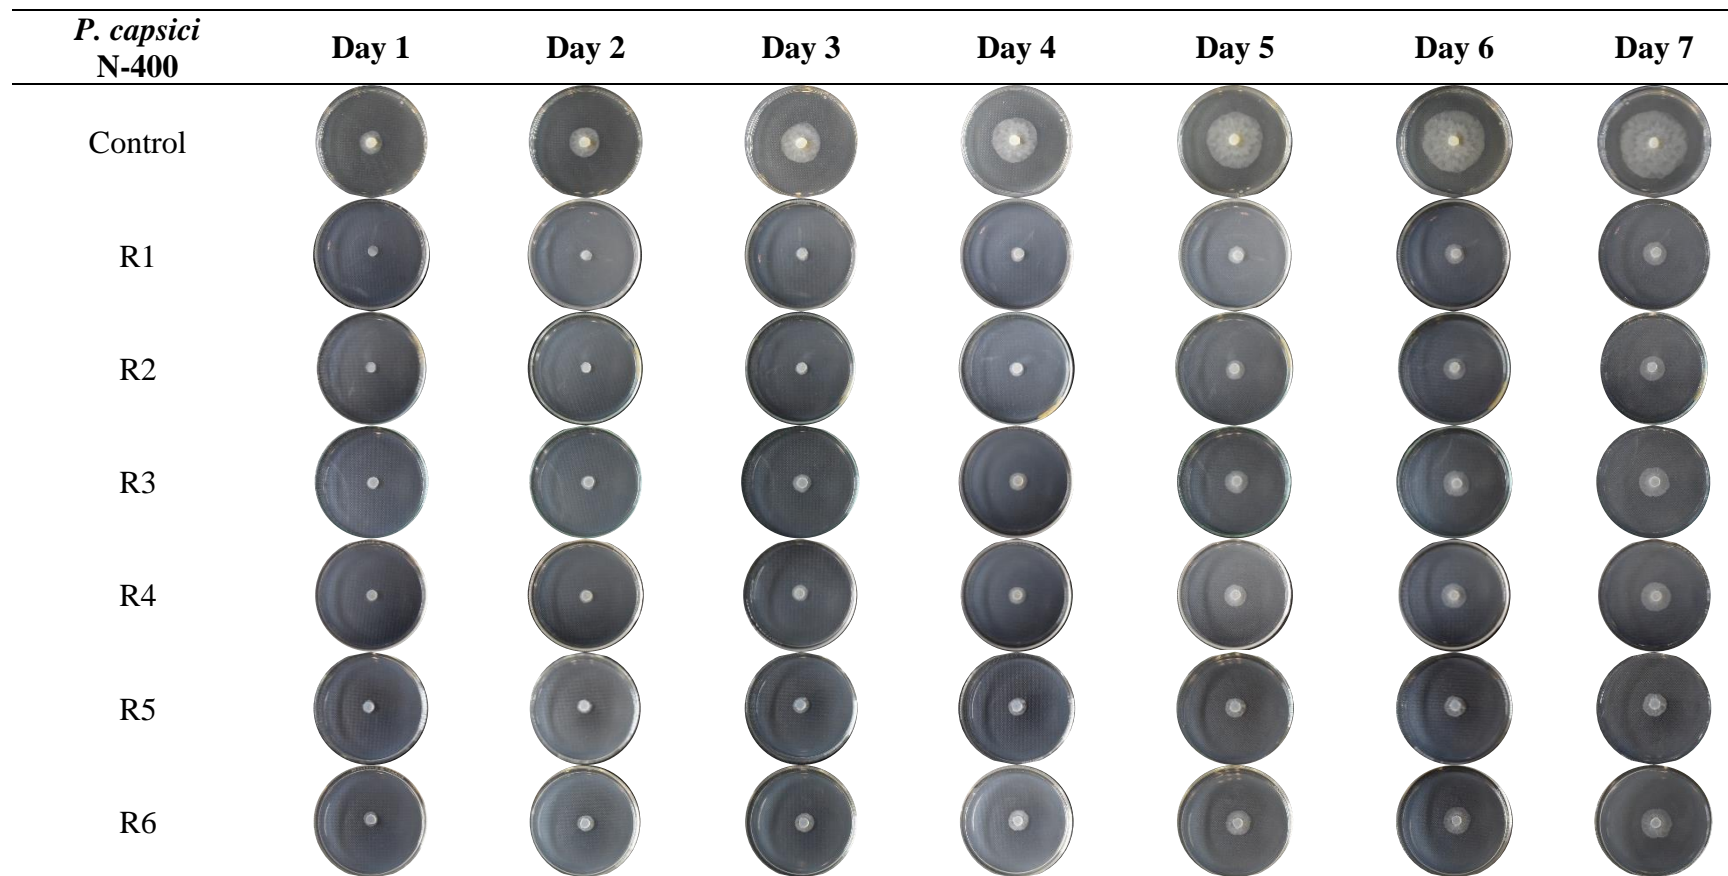

**Figure S19.** Effect on fungal growth of *Phytophthora capsici* after treatment with 400 ppm of neem oil. R1-R6: repetitions

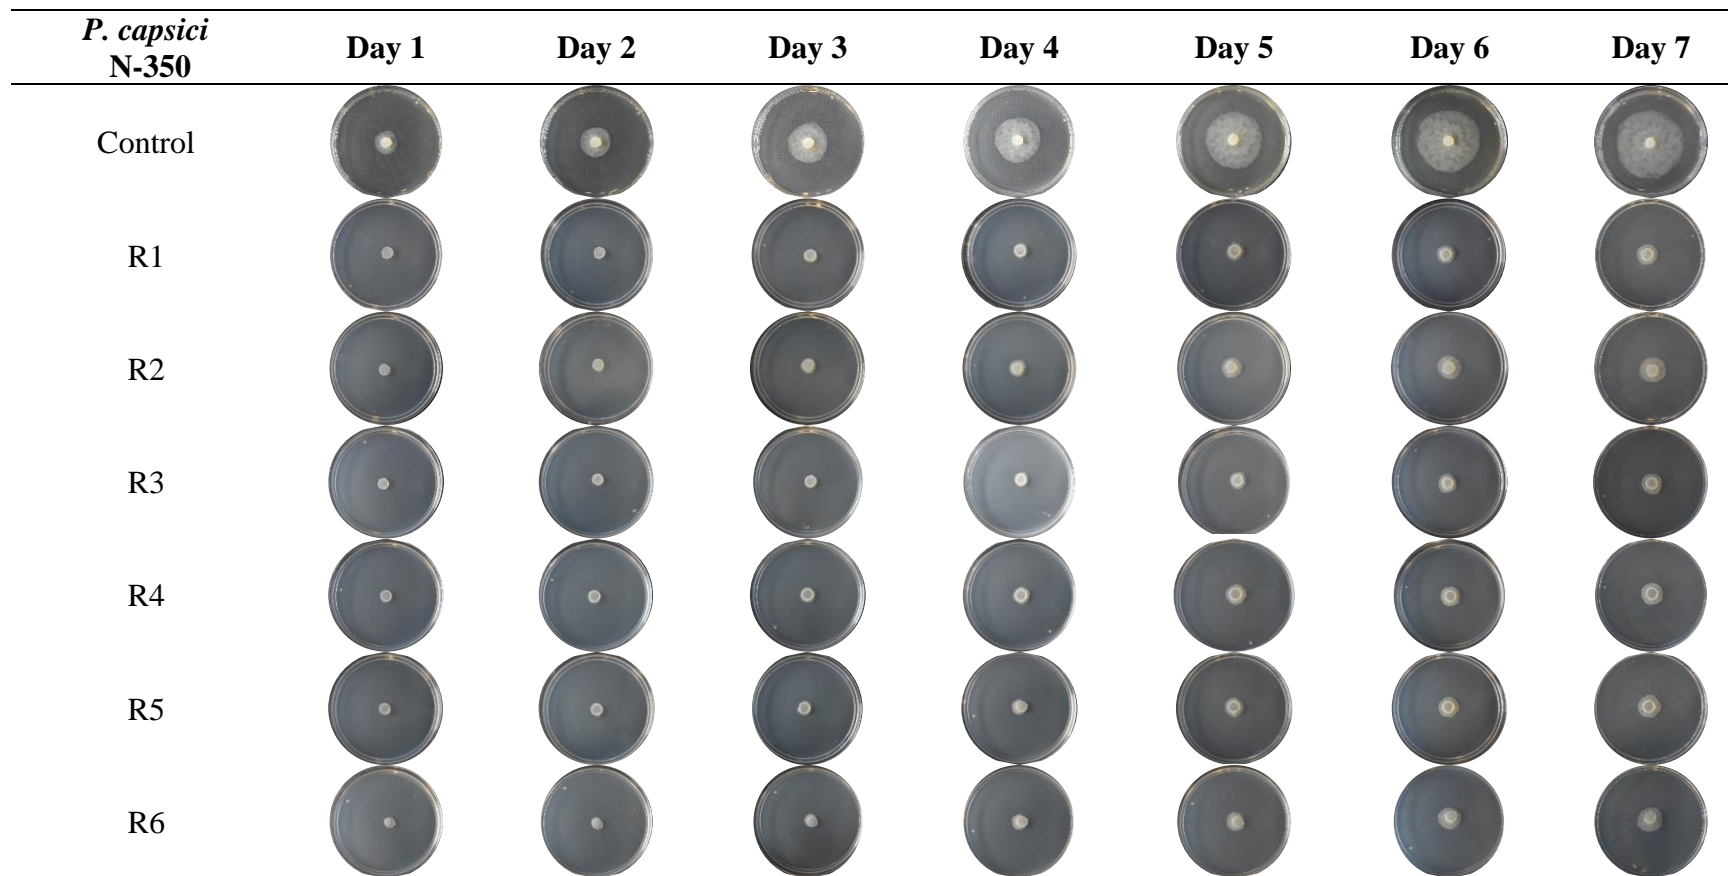

**Figure S20.** Effect on fungal growth of *Phytophthora capsici* after treatment with 350 ppm of neem oil. R1-R6: repetitions

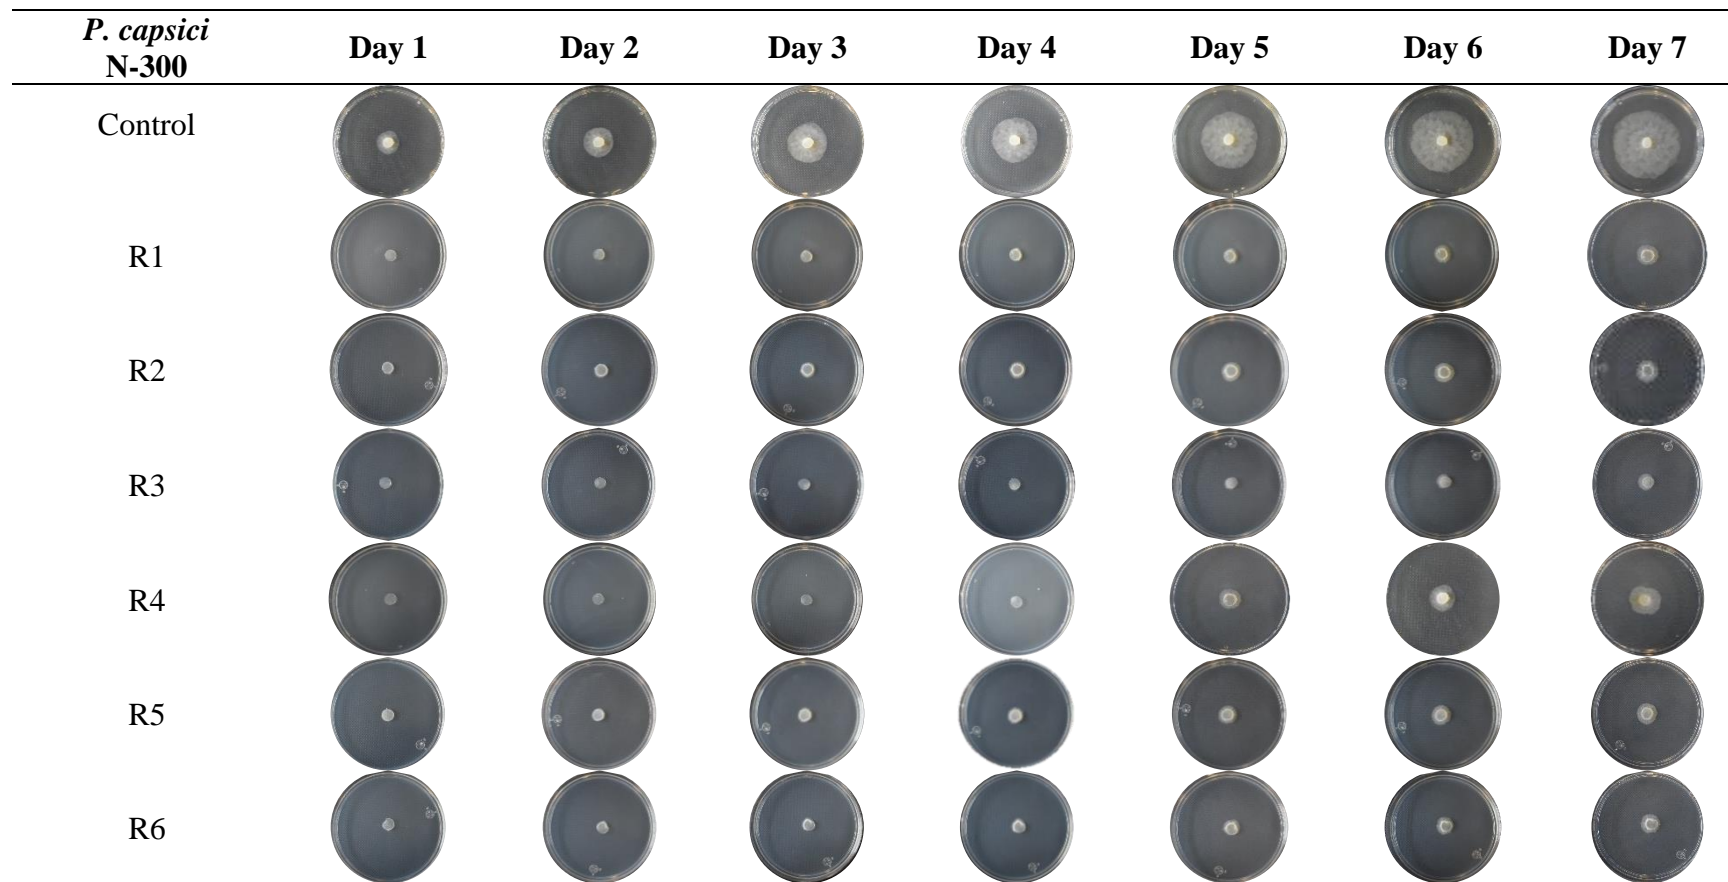

**Figure S21.** Effect on fungal growth of *Phytophthora capsici* after treatment with 300 ppm of neem oil. R1-R6: repetitions

| <i>Geotrichum</i> sp.<br>N-400 | Day 1                                                                               | Day 2                                                                               | Day 3                                                                                | Day 4                                                                                 | Day 5                                                                                 | Day 6                                                                                 | Day 7                                                                                 |
|--------------------------------|-------------------------------------------------------------------------------------|-------------------------------------------------------------------------------------|--------------------------------------------------------------------------------------|---------------------------------------------------------------------------------------|---------------------------------------------------------------------------------------|---------------------------------------------------------------------------------------|---------------------------------------------------------------------------------------|
| Control                        |    |    |    |    |    |    |    |
| R1                             |    |    |    |    |    |    |    |
| R2                             |    |    |    |    |    |    |    |
| R3                             |    |    |    |    |    |    |    |
| R4                             |    |    |    |    |    |    |    |
| R5                             |   |   |   |   |   |   |   |
| R6                             |  |  |  |  |  |  |  |

**Figure S22.** Effect on fungal growth of *Geotrichum* sp. after treatment with 400 ppm of neem oil. R1-R6: repetitions

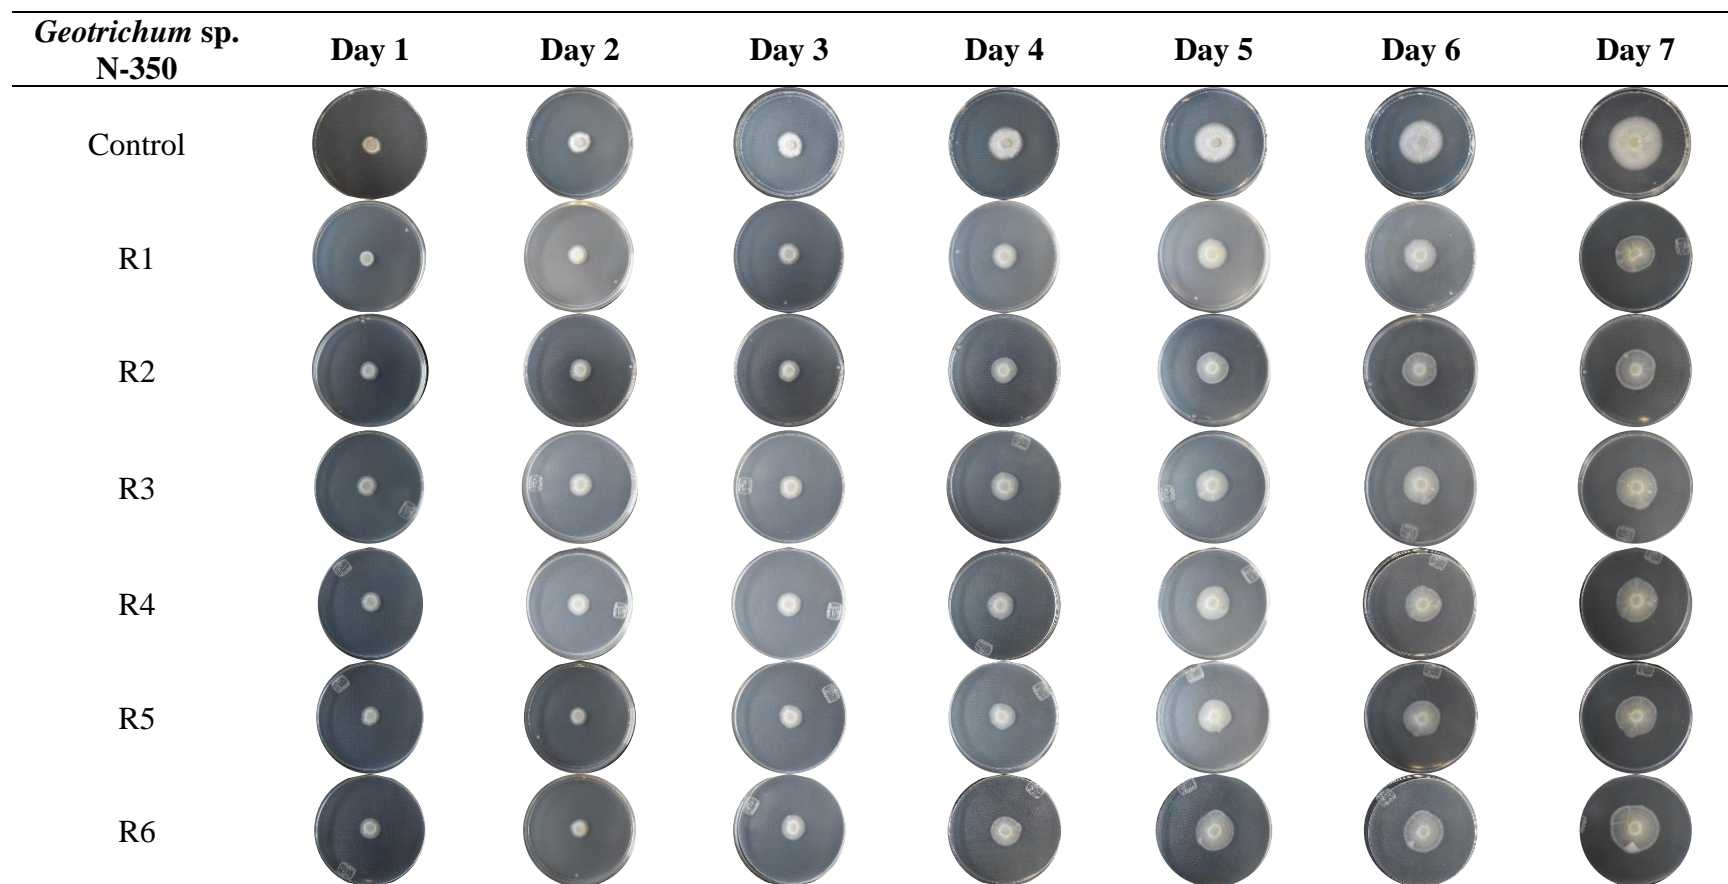

**Figure S23.** Effect on fungal growth of *Geotrichum* sp. after treatment with 350 ppm of neem oil. R1-R6: repetitions



| <i>Geotrichum</i> sp.<br>N-300 | Day 1                                                                              | Day 2                                                                              | Day 3                                                                               | Day 4                                                                                | Day 5                                                                                | Day 6                                                                                | Day 7                                                                                |
|--------------------------------|------------------------------------------------------------------------------------|------------------------------------------------------------------------------------|-------------------------------------------------------------------------------------|--------------------------------------------------------------------------------------|--------------------------------------------------------------------------------------|--------------------------------------------------------------------------------------|--------------------------------------------------------------------------------------|
| Control                        |   |   |   |   |   |   |   |
| R1                             |   |   |   |   |   |   |   |
| R2                             |   |   |   |   |   |   |   |
| R3                             |   |   |   |   |   |   |   |
| R4                             |   |   |   |   |   |   |   |
| R5                             |   |   |   |   |   |   |   |
| R6                             |  |  |  |  |  |  |  |

**Figure S24.** Effect on fungal growth of *Geotrichum* sp. after treatment with 300 ppm of neem oil. R1-R6: repetitions

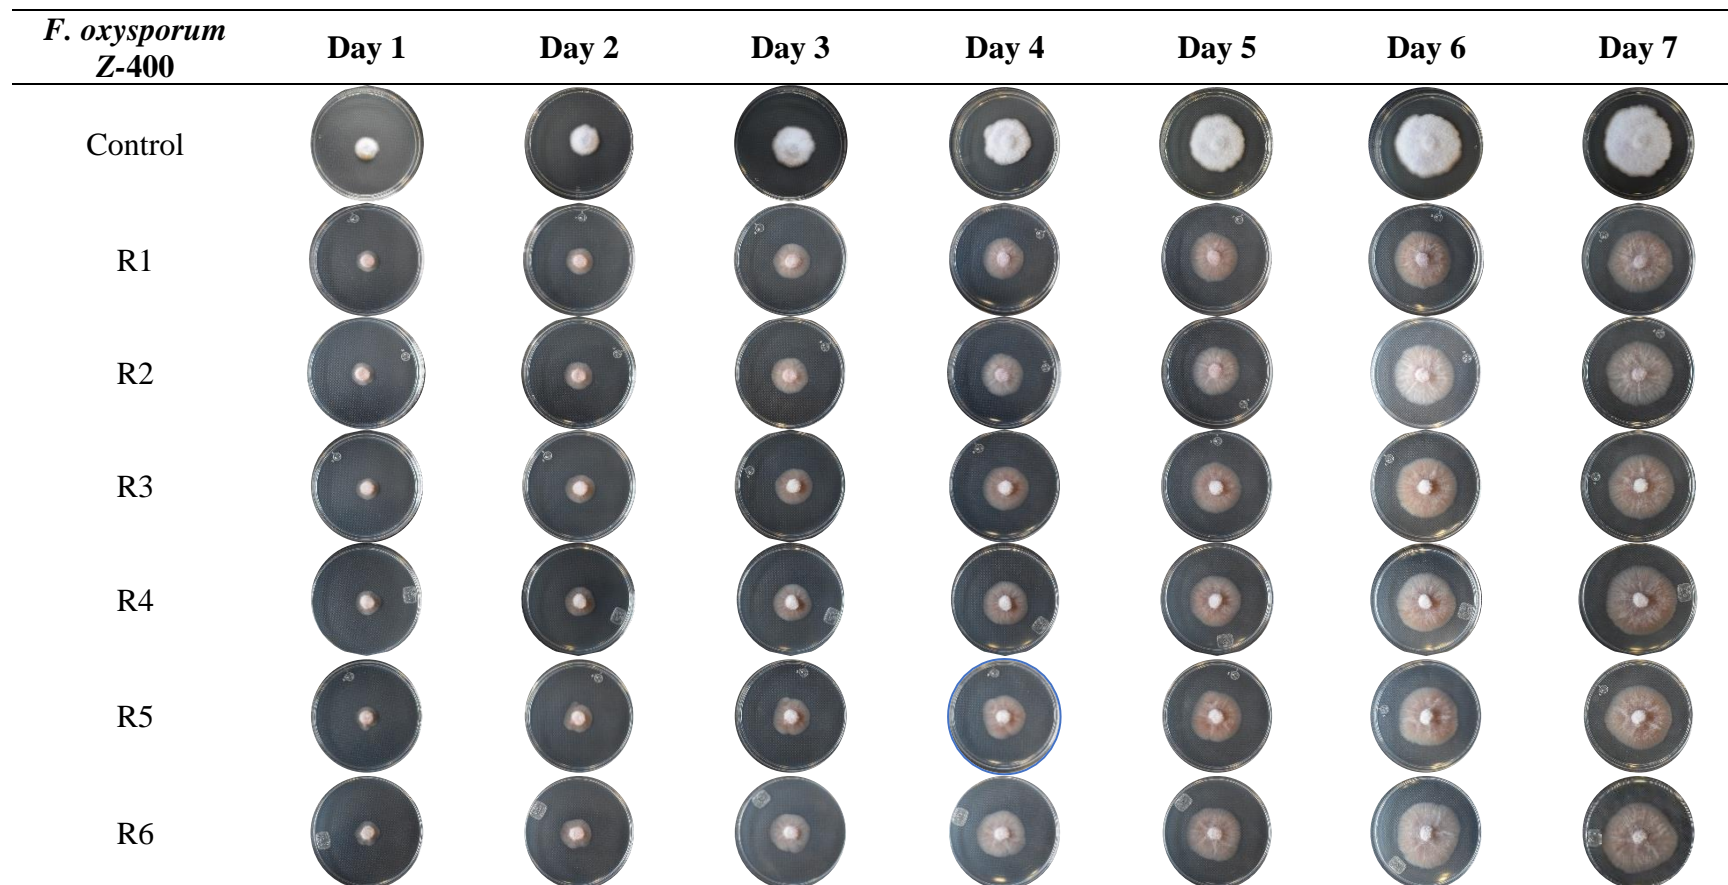

**Figure S25.** Effect on fungal growth of *Fusarium oxysporum* after treatment with 400 ppm of black sapote extract. R1-R6: repetitions

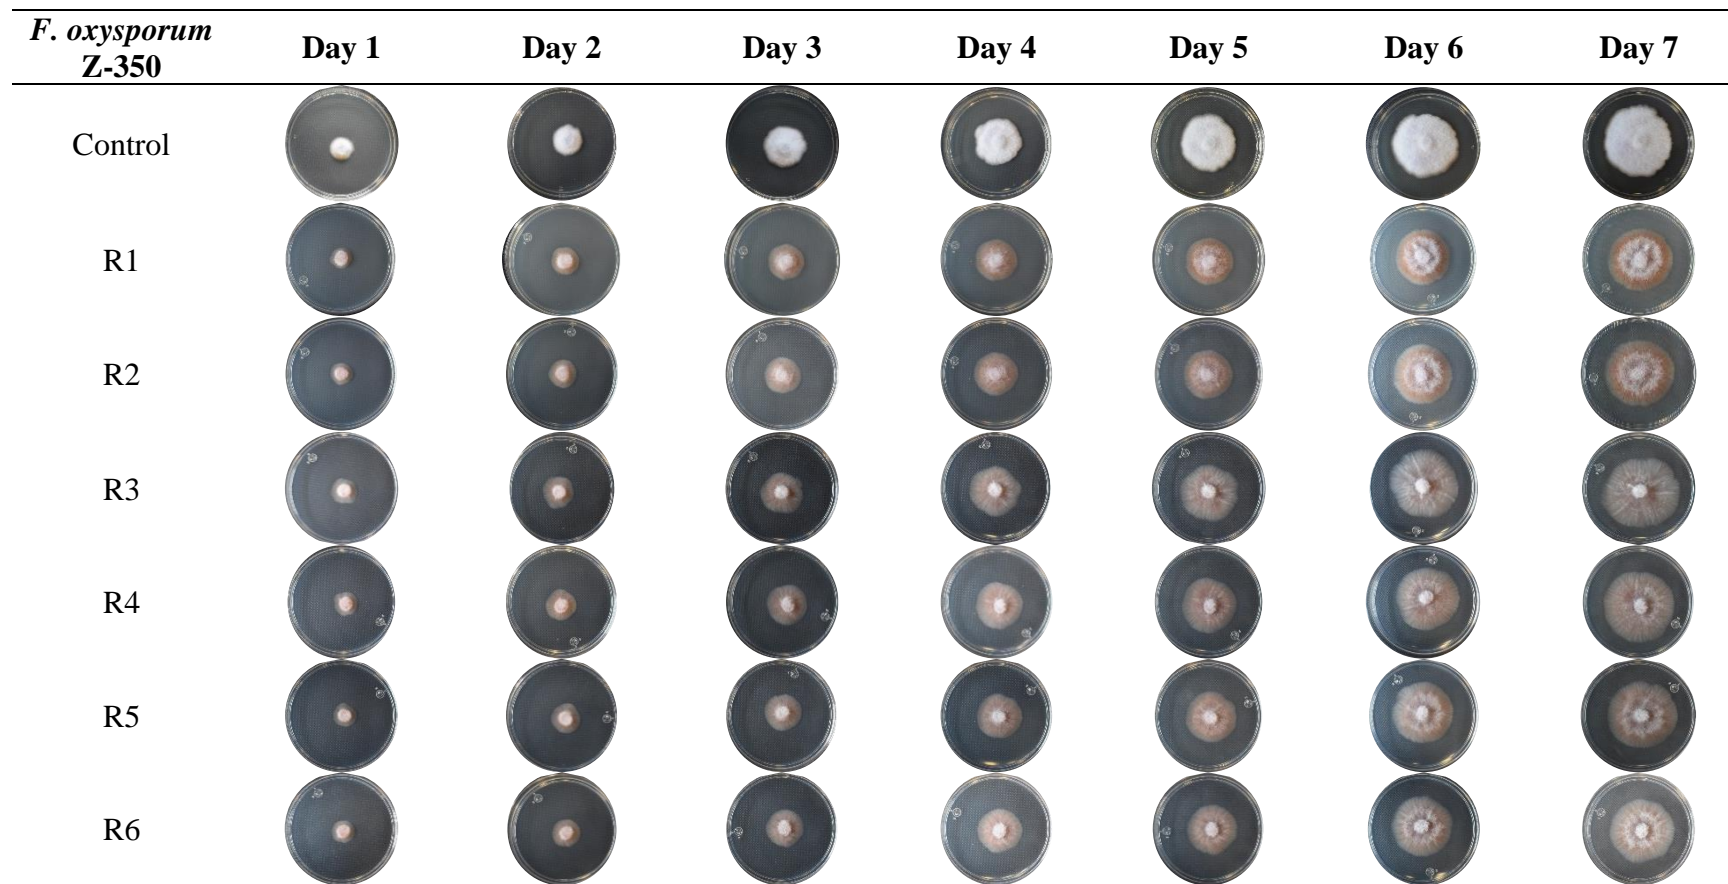

**Figure S26.** Effect on fungal growth of *Fusarium oxysporum* after treatment with 350 ppm of black sapote extract. R1-R6: repetitions

| <i>F. oxysporum</i><br>Z-300 | Day 1                                                                               | Day 2                                                                               | Day 3                                                                                | Day 4                                                                                 | Day 5                                                                                 | Day 6                                                                                 | Day 7                                                                                 |
|------------------------------|-------------------------------------------------------------------------------------|-------------------------------------------------------------------------------------|--------------------------------------------------------------------------------------|---------------------------------------------------------------------------------------|---------------------------------------------------------------------------------------|---------------------------------------------------------------------------------------|---------------------------------------------------------------------------------------|
| Control                      |    |    |    |    |    |    |    |
| R1                           |    |    |    |    |    |    |    |
| R2                           |    |    |    |    |    |    |    |
| R3                           |    |    |    |    |    |    |    |
| R4                           |    |    |    |    |    |    |    |
| R5                           |   |   |   |   |   |   |   |
| R6                           |  |  |  |  |  |  |  |

**Figure S27.** Effect on fungal growth of *Fusarium oxysporum* after treatment with 300 ppm of black sapote extract. R1-R6: repetitions



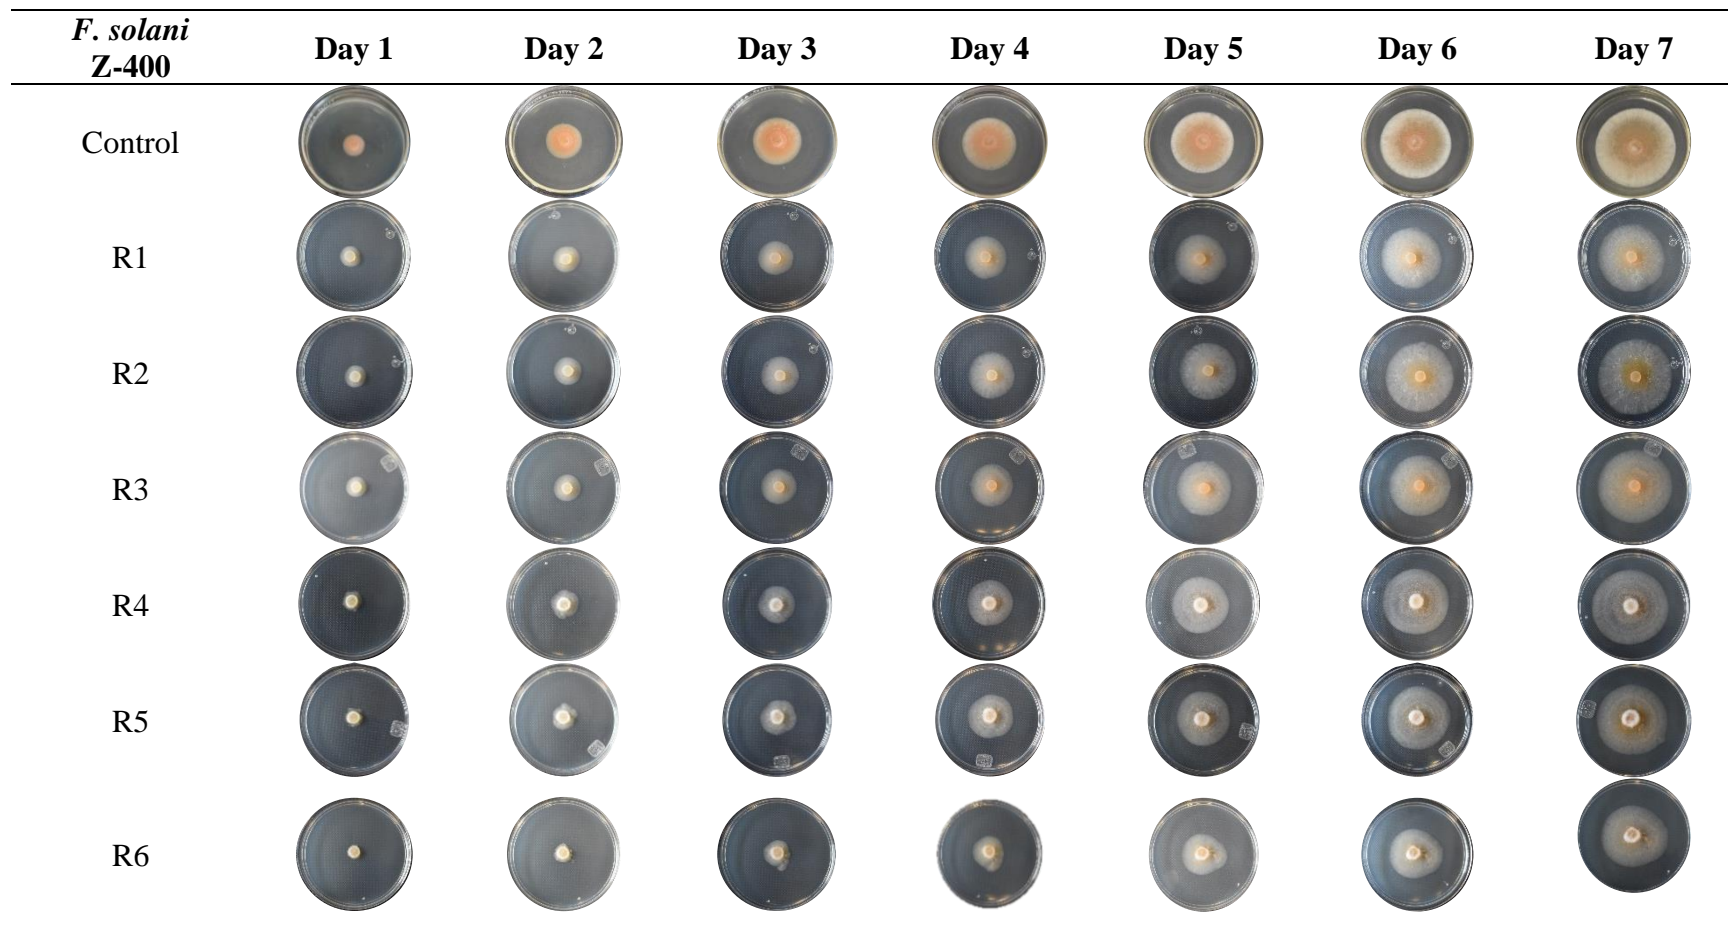

**Figure S28.** Effect on fungal growth of *Fusarium solani* after treatment with 400 ppm of black sapote extract. R1-R6: repetitions



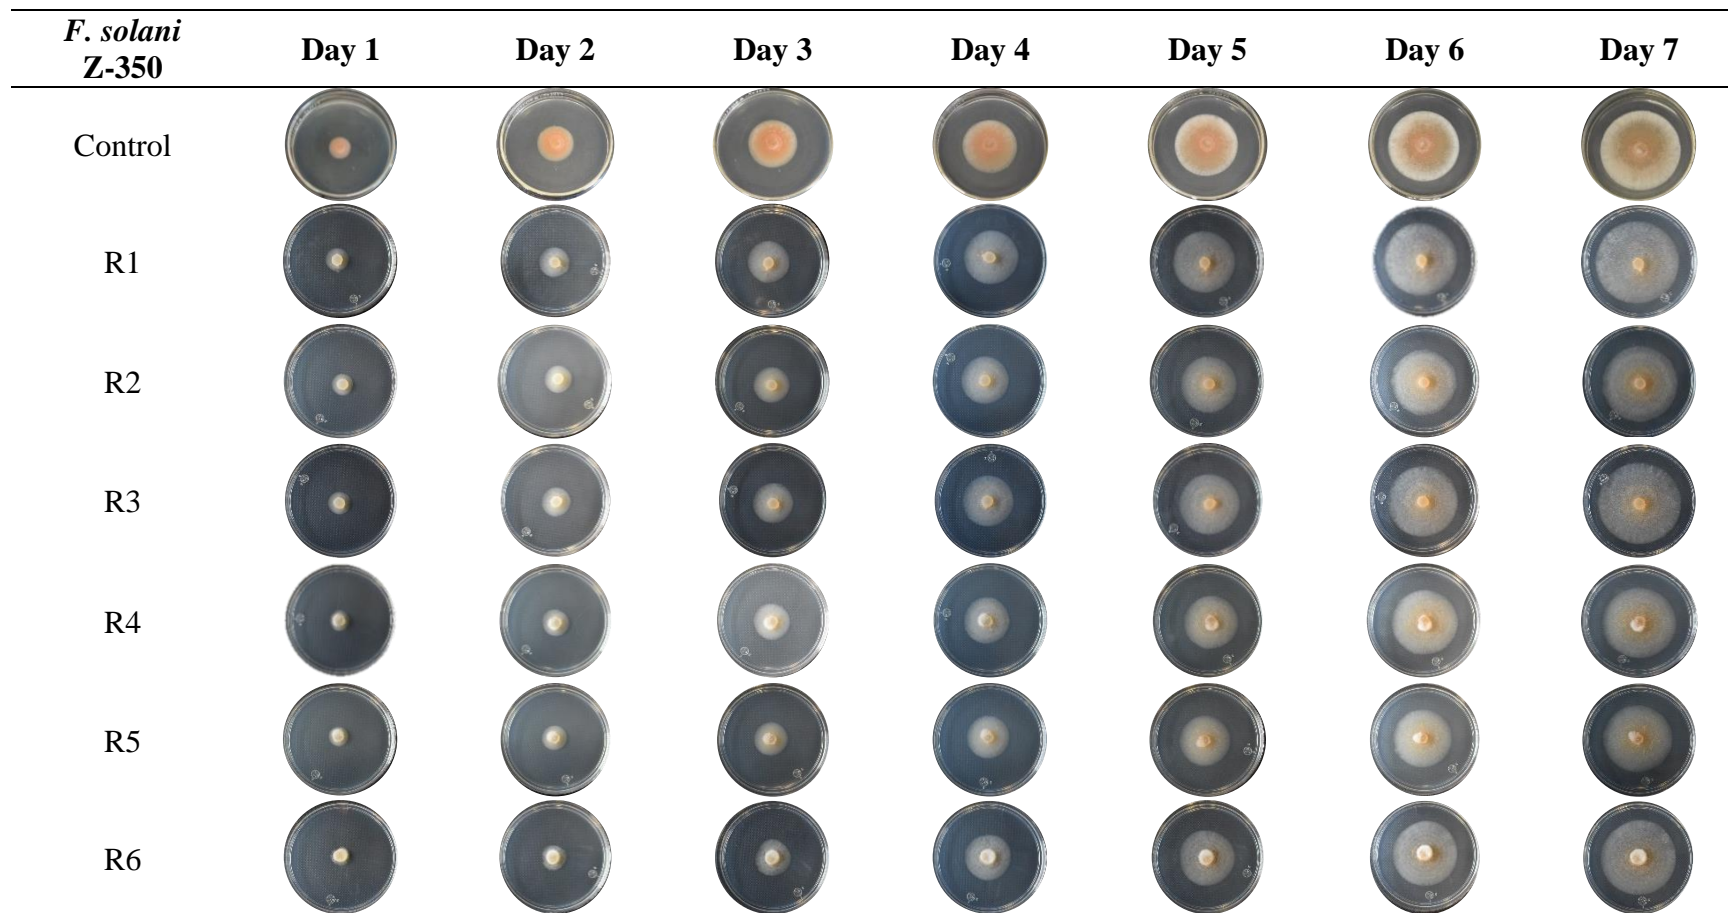

**Figure S29.** Effect on fungal growth of *Fusarium solani* after treatment with 350 ppm of black sapote extract. R1-R6: repetitions

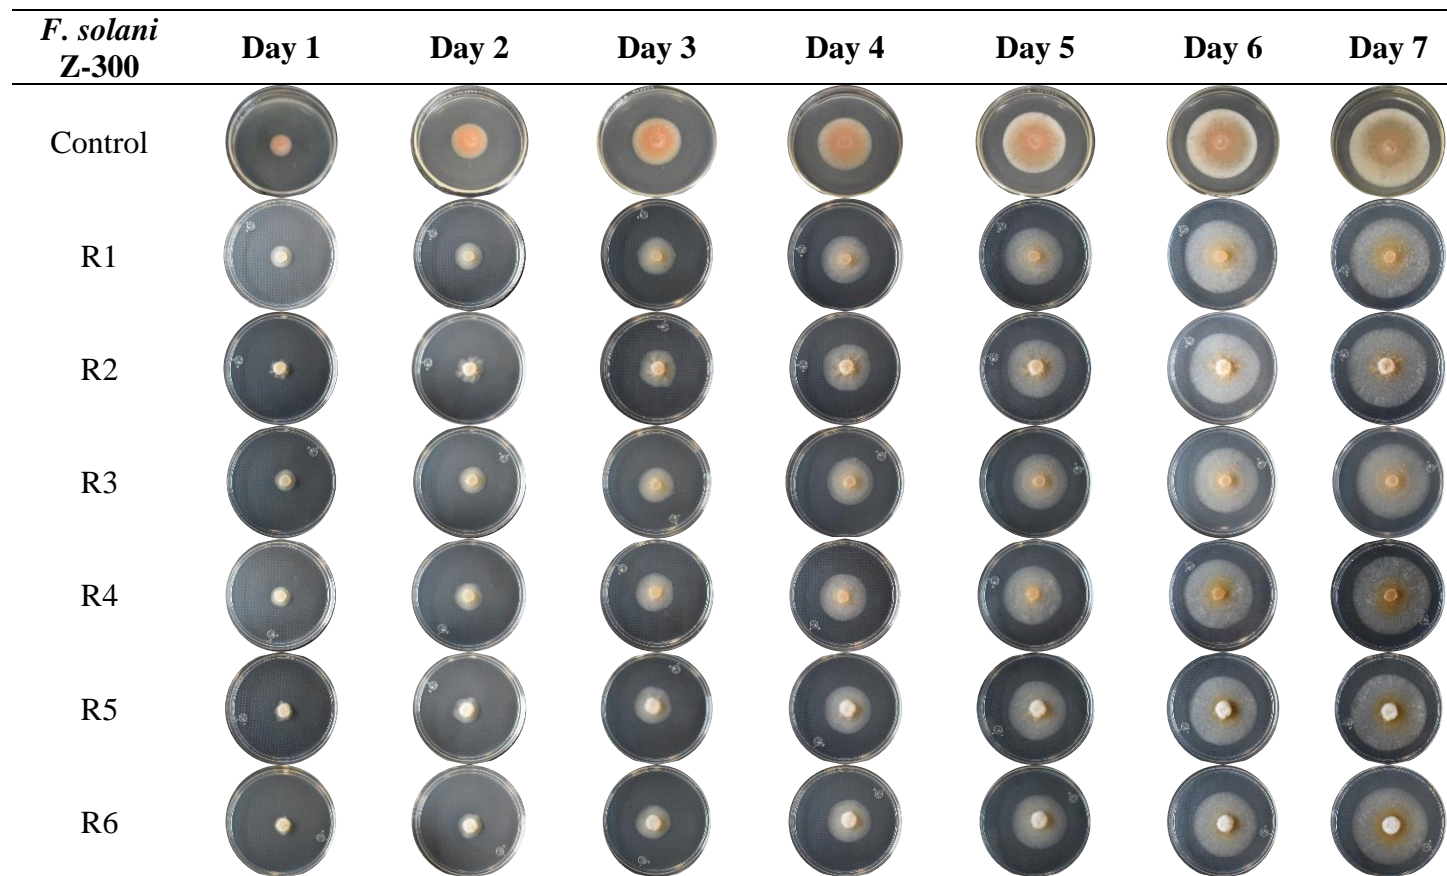

**Figure S30.** Effect on fungal growth of *Fusarium solani* after treatment with 300 ppm of black sapote extract. R1-R6: repetitions

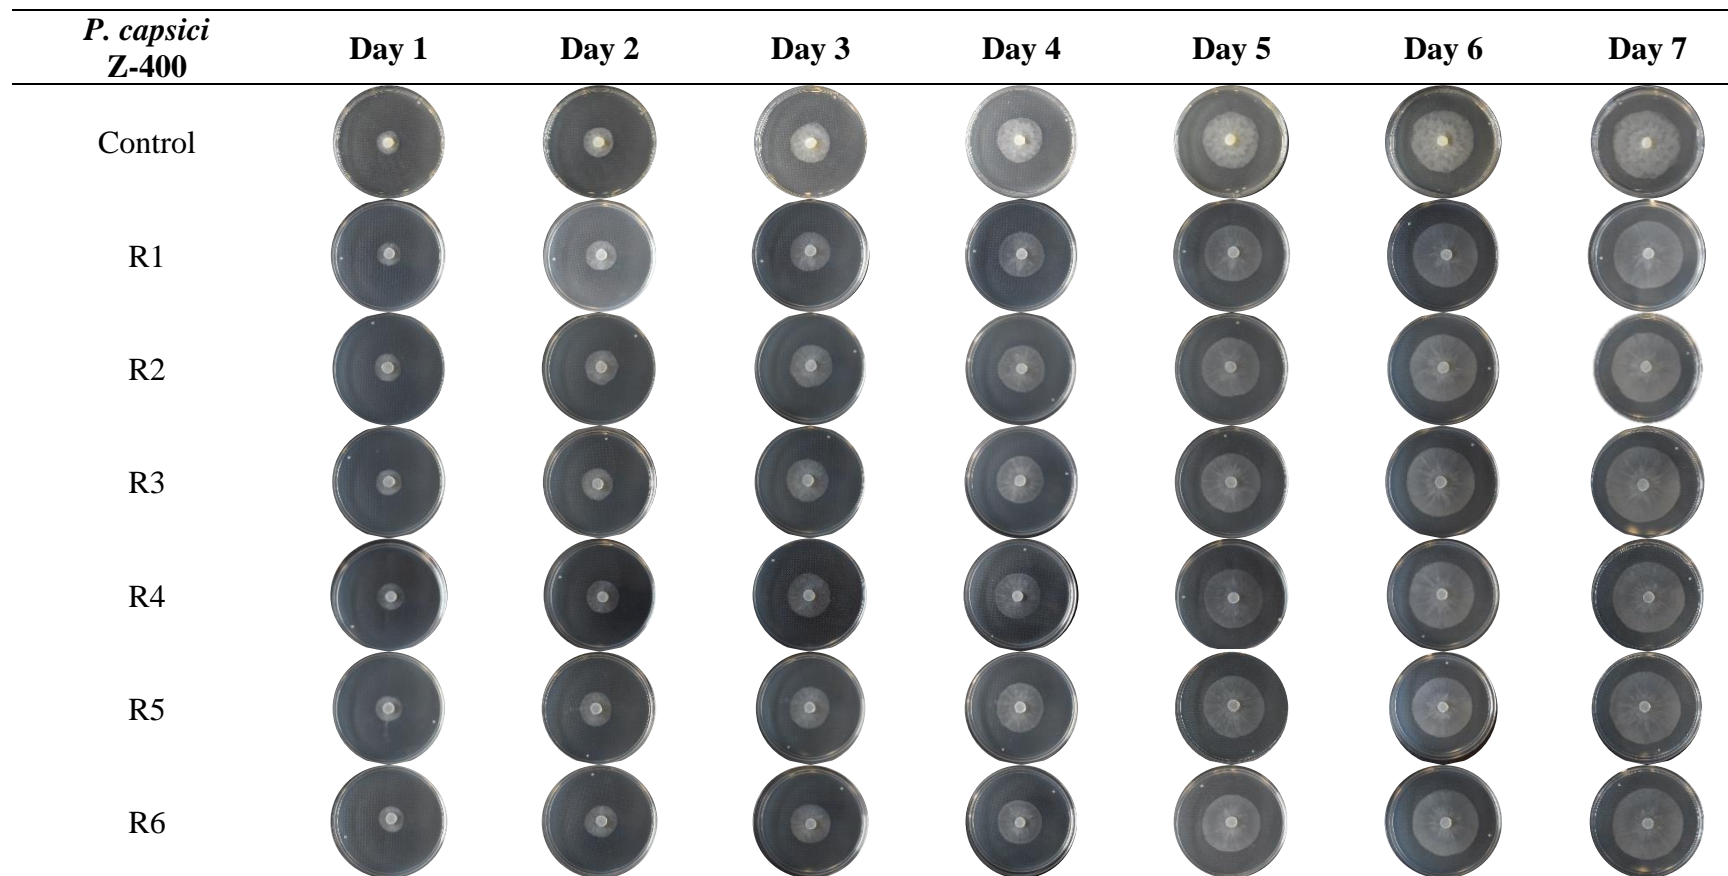

**Figure S31.** Effect on fungal growth of *Phytophthora capsici* after treatment with 400 ppm of black sapote extract. R1-R6: repetitions

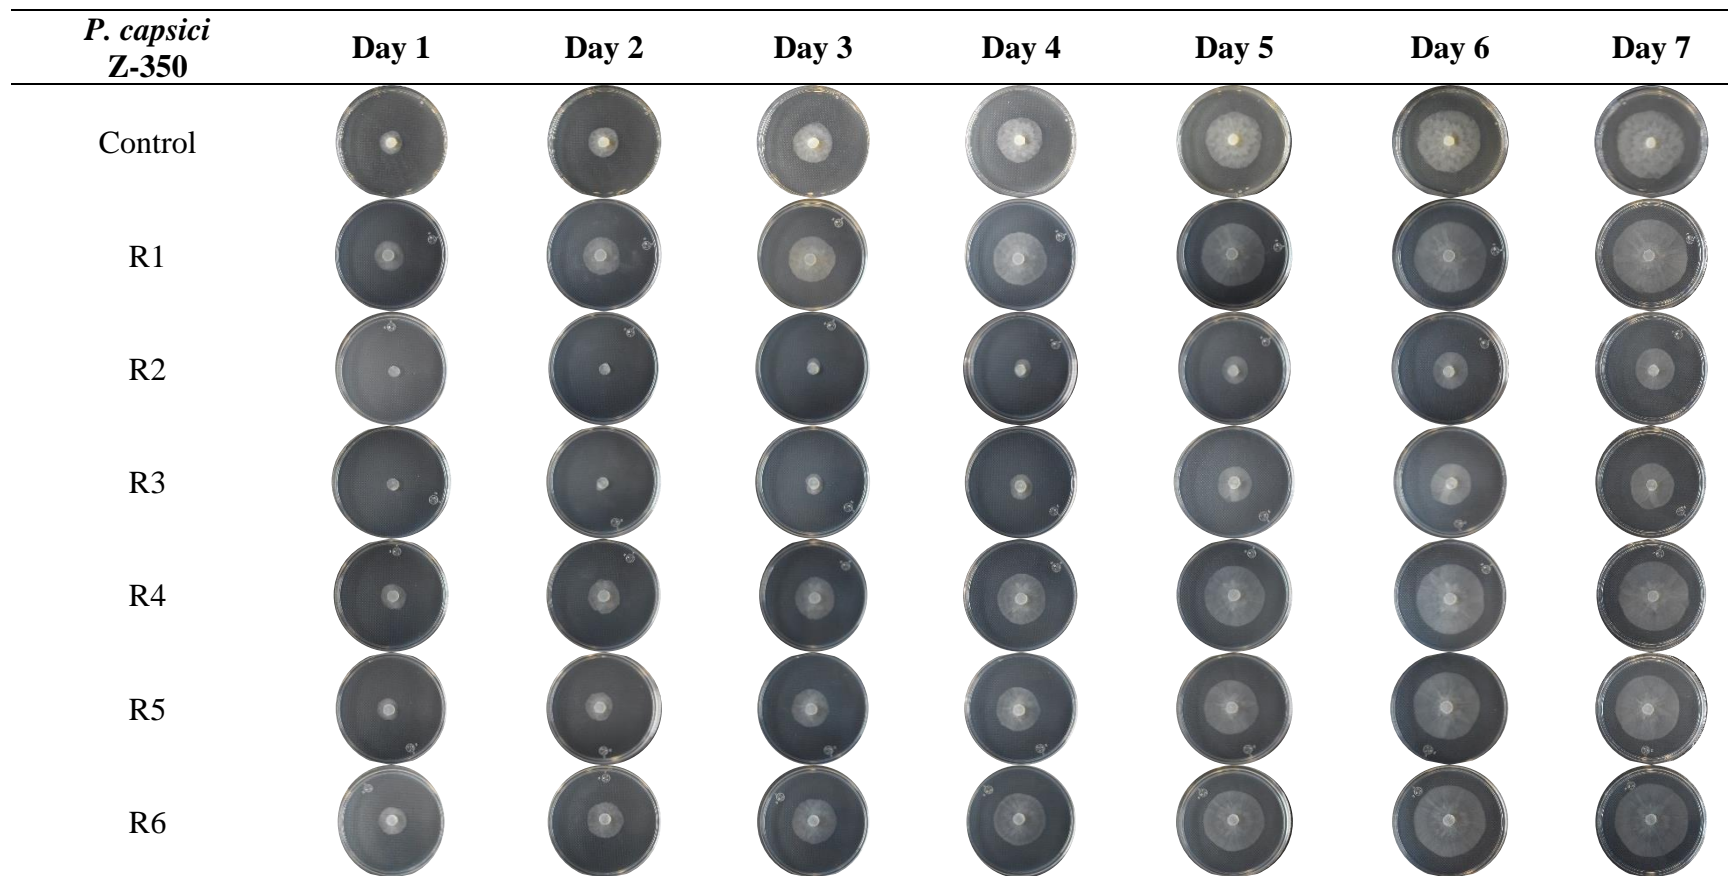

**Figure S32.** Effect on fungal growth of *Phytophthora capsici* after treatment with 350 ppm of black sapote extract. R1-R6: repetitions



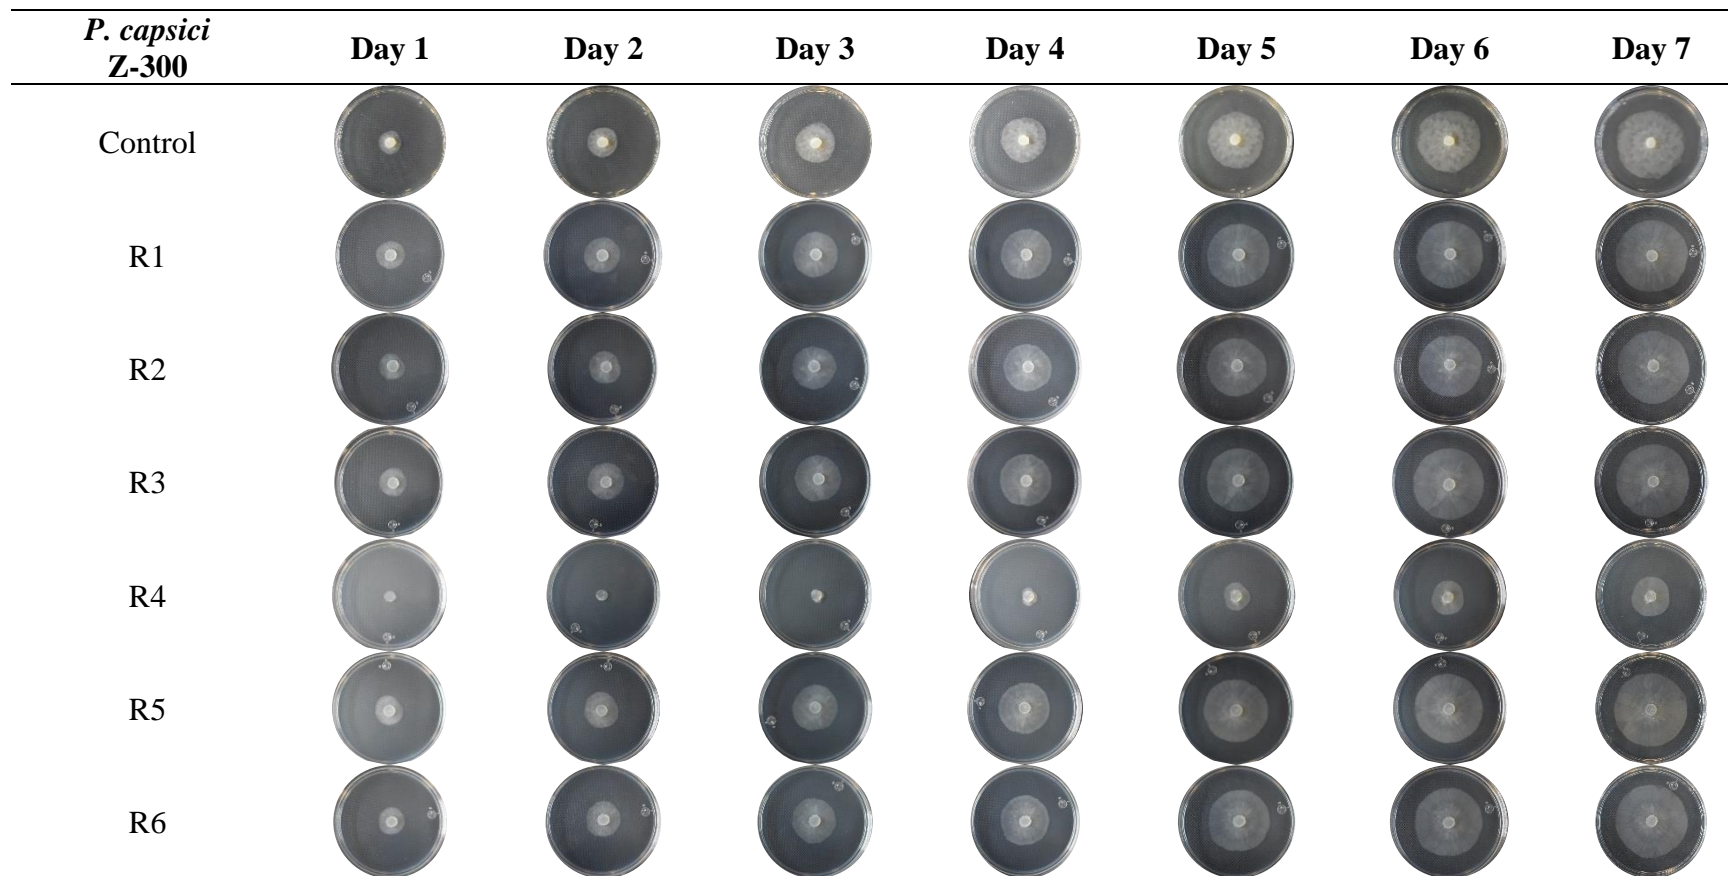

**Figure S33.** Effect on fungal growth of *Phytophthora capsici* after treatment with 300 ppm of black sapote extract. R1-R6: repetitions



| <i>Geotrichum</i> sp.<br>Z-400 | Day 1                                                                              | Day 2                                                                              | Day 3                                                                               | Day 4                                                                                | Day 5                                                                                | Day 6                                                                                | Day 7                                                                                |
|--------------------------------|------------------------------------------------------------------------------------|------------------------------------------------------------------------------------|-------------------------------------------------------------------------------------|--------------------------------------------------------------------------------------|--------------------------------------------------------------------------------------|--------------------------------------------------------------------------------------|--------------------------------------------------------------------------------------|
| Control                        |   |   |   |   |   |   |   |
| R1                             |   |   |   |   |   |   |   |
| R2                             |   |   |   |   |   |   |   |
| R3                             |   |   |   |   |   |   |   |
| R4                             |   |   |   |   |   |   |   |
| R5                             |   |   |   |   |   |   |   |
| R6                             |  |  |  |  |  |  |  |

**Figure S34.** Effect on fungal growth of *Geotrichum* sp. after treatment with 400 ppm of black sapote extract. R1-R6: repetitions

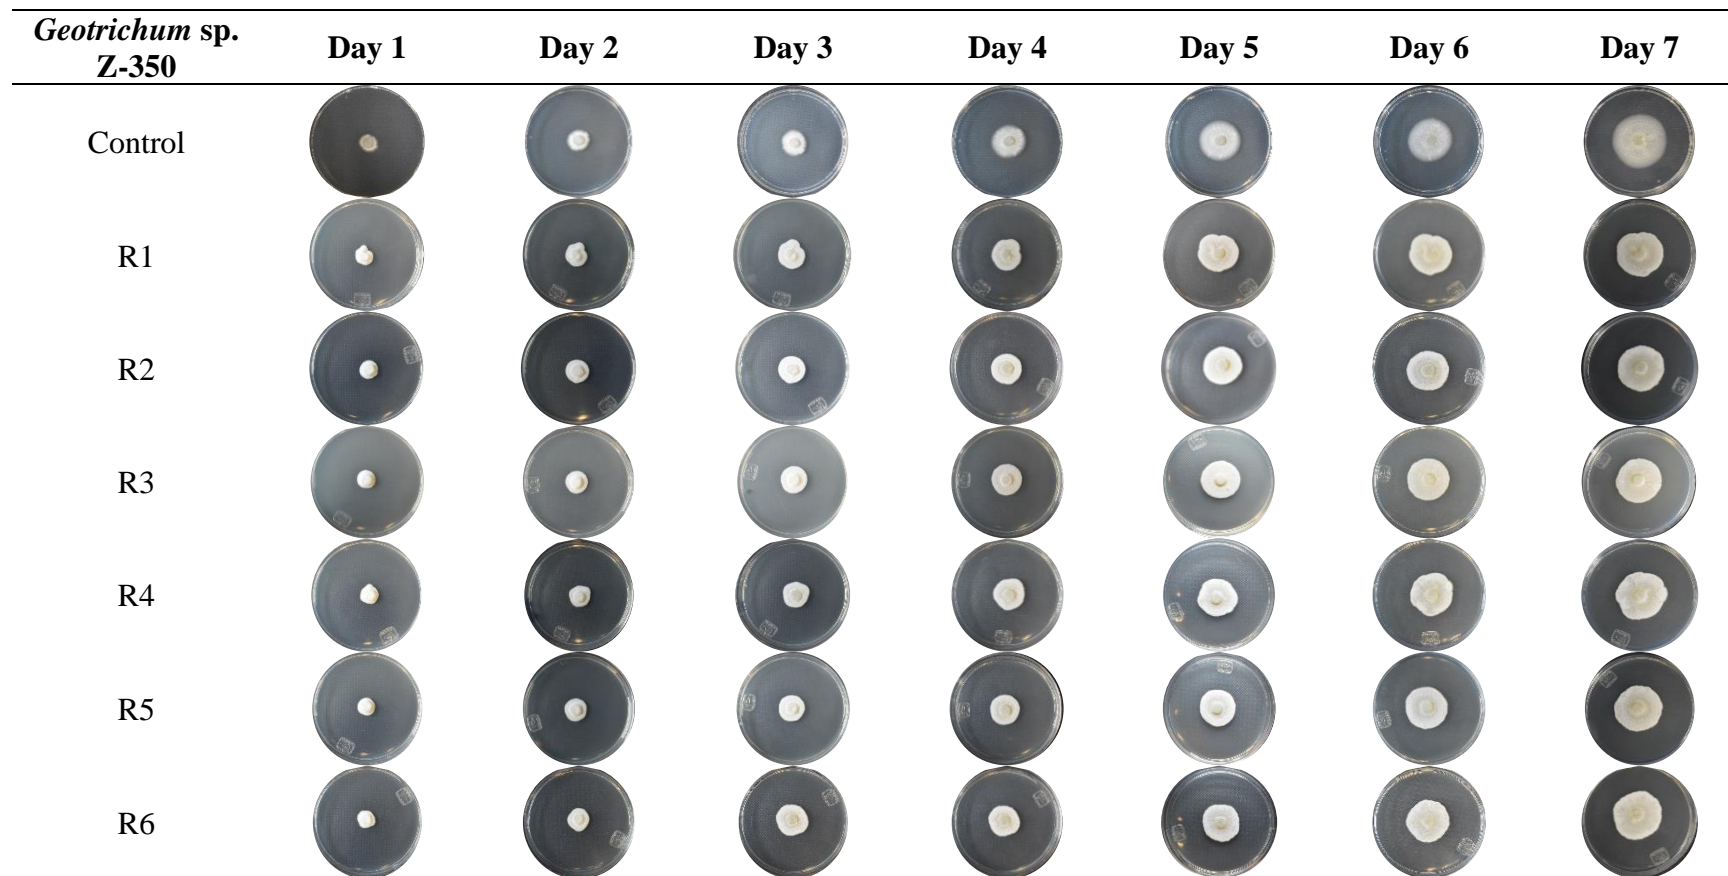

**Figure S35.** Effect on fungal growth of *Geotrichum* sp. after treatment with 350 ppm of black sapote extract. R1-R6: repetitions

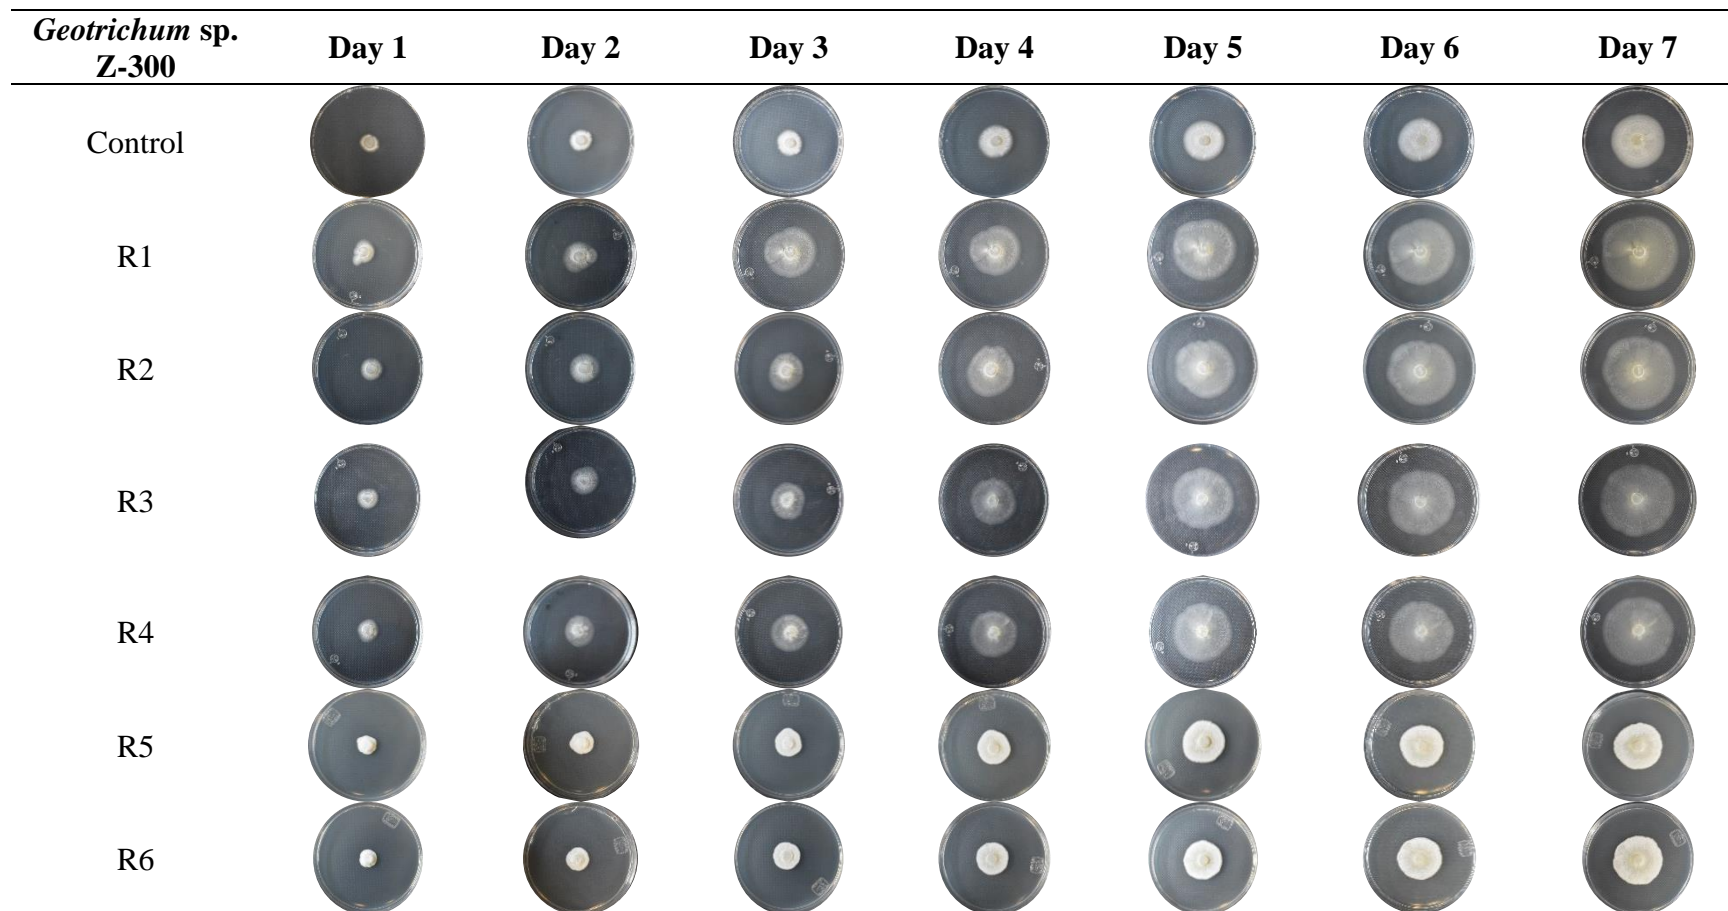

**Figure S36.** Effect on fungal growth of *Geotrichum* sp. after treatment with 300 ppm of black sapote extract. R1-R6: repetitions
